# Supplementary material for: Directing research funds to the right research projects: a review of criteria used by research organisations in Australia in prioritising health research projects for funding
Source: PubMed Central journal article supplement — BMJ Open. 2018 Dec 22;8(12):e026207. doi: 10.1136/bmjopen-2018-026207 (PMC6318516; doi:10.1136/bmjopen-2018-026207), 2018-12-22
Supplement: bmjopen-2018-026207.draft_revisions.pdf [file bmjopen-2018-026207.draft_revisions.pdf]

# BMJ Open

BMJ Open is committed to open peer review. As part of this commitment we make the peer review history of every article we publish publicly available.

When an article is published we post the peer reviewers' comments and the authors' responses online. We also post the versions of the paper that were used during peer review. These are the versions that the peer review comments apply to.

The versions of the paper that follow are the versions that were submitted during the peer review process. They are not the versions of record or the final published versions. They should not be cited or distributed as the published version of this manuscript.

BMJ Open is an open access journal and the full, final, typeset and author-corrected version of record of the manuscript is available on our site with no access controls, subscription charges or pay-per-view fees (<http://bmjopen.bmj.com>).

If you have any questions on BMJ Open's open peer review process please email [info.bmjopen@bmj.com](mailto:info.bmjopen@bmj.com)

# BMJ Open

## Directing research funds to the right research projects: a review of criteria used by research organisations in Australia in prioritising health research projects for funding

|                               |                                                                                                                                                                                                                                                                                                                                                                                                                                                                                             |
|-------------------------------|---------------------------------------------------------------------------------------------------------------------------------------------------------------------------------------------------------------------------------------------------------------------------------------------------------------------------------------------------------------------------------------------------------------------------------------------------------------------------------------------|
| Journal:                      | <i>BMJ Open</i>                                                                                                                                                                                                                                                                                                                                                                                                                                                                             |
| Manuscript ID                 | bmjopen-2018-026207                                                                                                                                                                                                                                                                                                                                                                                                                                                                         |
| Article Type:                 | Research                                                                                                                                                                                                                                                                                                                                                                                                                                                                                    |
| Date Submitted by the Author: | 22-Aug-2018                                                                                                                                                                                                                                                                                                                                                                                                                                                                                 |
| Complete List of Authors:     | Tuffaha, Haitham; Griffith University Menzies Health Institute Queensland; Griffith University Centre for Applied Health Economics<br>El_Saifi, Najwan; Griffith University Menzies Health Institute Queensland; Griffith University Centre for Applied Health Economics<br>Chambers, Suzanne; Griffith University Menzies Health Institute Queensland<br>Scuffham, Paul; Griffith University, Menzies Health Institute Queensland; Griffith University Centre for Applied Health Economics |
| Keywords:                     | research prioritisation, selection criteria, value for money                                                                                                                                                                                                                                                                                                                                                                                                                                |
|                               |                                                                                                                                                                                                                                                                                                                                                                                                                                                                                             |

SCHOLARONE™  
Manuscripts

Peer Review Only

1  
2  
3 1 **Directing research funds to the right research projects: a review of criteria used by research**  
4  
5 2 **organisations in Australia in prioritising health research projects for funding**  
6  
7 3  
8  
9

10 4 **Haitham Tuffaha<sup>1,2\*</sup>, Najwan El-Saifi<sup>1,2</sup>, Suzanne Chambers<sup>1</sup>, Paul Scuffham<sup>1,2</sup>**  
11 5

- 12 6 1. Griffith University Menzies Health Institute Queensland, Gold Coast, Queensland  
13 7 Australia.  
14  
15 8 2. Griffith University Centre for Applied Health Economics, Nathan, Queensland,  
16 9 Australia  
17

18 10  
19 11 **\*Corresponding Author contact details**  
20

21  
22 12 Centre for Applied Health Economics, School of Medicine, Griffith University,  
23  
24 13 Nathan, 4111, QLD, Australia.  
25

26 14 [haitham.tuffaha@griffith.edu.au](mailto:haitham.tuffaha@griffith.edu.au)  
27

28 15 Tel: + 61 7373 59104  
29

30 16 Fax: +61 7 373 59118  
31  
32  
33 17  
34

35 18 **Key words: research prioritisation, selection criteria, value for money**  
36  
37

38 19 **Word count: 2500**  
39  
40  
41 20  
42  
43  
44  
45  
46  
47  
48  
49  
50  
51  
52  
53  
54  
55  
56  
57  
58  
59  
60

1  
2  
3 21 **Directing research funds to the right research projects: a review of criteria used by research**  
4  
5 22 **organisations in Australia in prioritising health research projects for funding**  
6

7 23 **Abstract**  
8

9  
10 24 **Objectives**  
11

12  
13 25 Healthcare budgets are limited, and therefore, research funds should be wisely allocated to  
14  
15 26 ensure high quality, useful and cost-effective research. We aimed to critically review the  
16  
17 27 criteria considered by major Australian organisations in prioritising and selecting health  
18  
19 28 research projects for funding.  
20

21  
22 29 **Methods**  
23

24  
25 30 We reviewed all grant schemes listed on the Australian Competitive Grants Register that  
26  
27 31 were health-related, active in 2017 and with publicly available selection criteria on the  
28  
29 32 funders' websites. Data extracted included scheme name, funding organisation, selection  
30  
31 33 criteria and the relative weight assigned to each criterion. Selection criteria were grouped into  
32  
33 34 five representative domains: relevance, appropriateness, significance, feasibility (including  
34  
35 35 team quality) and cost-effectiveness (i.e., value for money).  
36  
37

38 36 **Results**  
39

40  
41 37 Thirty-six schemes were included from 158 identified. One half of the schemes were under  
42  
43 38 the National Health and Medical Research Council. The most commonly used criteria were  
44  
45 39 research team quality and capability (94%), research plan clarity (94%), scientific quality  
46  
47 40 (92%) and research impact (92%). Criteria considered less commonly were existing  
48  
49 41 knowledge (22%), fostering collaboration (22%), research environment (19%), value for  
50  
51 42 money (14%), disease burden (8%) and ethical/moral considerations (3%). In terms of  
52  
53 43 representative domains, relevance was considered in 72% of the schemes, appropriateness in  
54  
55  
56  
57  
58  
59  
60

1  
2  
3 44 92%, significance in 94%, feasibility in 100%, and cost-effectiveness in 17%. The relative  
4  
5 45 weights for the selection criteria varied across schemes with 5-30% for relevance, 20-60% for  
6  
7 46 each appropriateness and significance, 20-75% for feasibility and 15-33% for cost-  
8  
9 47 effectiveness.

## 11 48 **Conclusions**

12  
13  
14  
15 49 In selecting research projects for funding, Australian research organisations focus largely on  
16  
17 50 research appropriateness, significance and feasibility; however, value for money is most often  
18  
19 51 overlooked. Research funding decisions should include an assessment of value for money in  
20  
21 52 order to maximise return on research investment.

22  
23  
24 53

## 25 54 **Strengths and limitations**

- 26  
27  
28  
29 55 1. The first critical review of research project selection criteria from a funder perspective  
30  
31 56 in Australia.
- 32  
33 57 2. A comprehensive review of available funding schemes, selection criteria and scoring  
34  
35 58 weights to prioritise research proposals.
- 36  
37 59 3. The recommendations provided will help research organisation streamline funding to  
38  
39 60 worthy projects to maximise return on research investment.
- 40  
41 61 4. The review takes an Australian perspective, but the findings and recommendations  
42  
43 62 maybe applicable to other jurisdictions

44  
45  
46  
47 63  
48  
49  
50  
51  
52  
53  
54  
55  
56  
57  
58  
59  
60

## 64 INTRODUCTION

65  
66 Research is vital to generate evidence to guide medical decision making and improve  
67 health. Therefore, the Australian Government and various research organisations allocate  
68 considerable resources to fund clinical trials and other health research. The total expenditure  
69 on health research in Australia was around \$5.4 billion dollar in 2014.[1] Recently, the  
70 Australian Government has announced the establishment of the \$20 billion Medical Research  
71 Future Fund.[2] There has been an emerging interest in Australia and internationally to  
72 maximise value and reduce waste in healthcare research.[3-5] Although research value should  
73 be ensured throughout the continuum (i.e., from research question development to  
74 implementation of the findings), directing research funds to the right research projects in the  
75 first place is key to optimise health and economic benefits from healthcare research.

76 Most research projects in Australia are investigator initiated and researchers must  
77 seek financial support for their proposals through research funding organisations (e.g., the  
78 National Health and Medical Research Council (NHMRC)). However, the overall funds  
79 available for research are limited compared to the number of submissions and decisions have  
80 to be made about the best way to distribute research funds. Thus, funding organisations need  
81 to have a transparent and systematic way to evaluate and prioritise research projects for  
82 funding.[5-7] This is often done based on the assessments of the merits of the submitted  
83 proposals according to the judgments of experts sitting on funding panels.[6, 8] In this  
84 process, submitted proposals are assessed and scored against predefined criteria with each  
85 criterion, or group of criteria, being assigned a weight reflecting its relative importance. Such  
86 practice corroborates with the recommendations of many international initiatives for setting  
87 research priorities where the use of explicit and comprehensive criteria is encouraged to  
88 ensure that important considerations are not overlooked during the selection process.[7, 9-12]

1  
2  
3 89 In general, these criteria may include burden of the disease, equity, scientific rigor, research  
4  
5 90 team capabilities, innovation and impact of research results; however, the choice of criteria  
6  
7 91 and the scoring system may differ, depending on the needs of stakeholders involved in this  
8  
9 92 exercise.[7, 9-12]

11 93 Whilst health research funding decisions in Australia rely heavily on the ability of  
12  
13 94 research proposals to meet selection criteria, it is unknown what criteria are more commonly  
14  
15 95 used by research funders, how these criteria and their weights vary across funding  
16  
17 96 organisations, and whether these criteria are comprehensive enough to capture all important  
18  
19 97 considerations to ensure high quality and cost-effective research. This knowledge is  
20  
21 98 important to assess the current approach of selecting and funding research projects, and to  
22  
23 99 guide future efforts to optimise health research funding mechanisms in the country.  
24  
25  
26 100 Therefore, the aim of this paper was to critically review the criteria considered by major  
27  
28 101 Australian research organisations in their selection of health research projects for funding.  
29  
30

31 102

### 32 103 **METHODS**

34 104 We reviewed all research funding schemes listed on the Australian Competitive  
35  
36 105 Grants Register (ACGR), which provides a comprehensive list of funding schemes that have  
37  
38 106 been approved by the Australian Government as being competitive research grants.[13] The  
39  
40 107 identified schemes were included if they were health related, active in 2017, and had clear  
41  
42 108 selection criteria which were publically available on the funders' websites. Health research  
43  
44 109 refers to research with human health or medical purpose, including research on the aetiology,  
45  
46 110 diagnosis or management of disease, mental condition or behaviour in human. To focus on  
47  
48 111 schemes for funding research projects and programs, research schemes dedicated solely to  
49  
50 112 training, capacity building, equipment or infrastructure were excluded. These include  
51  
52 113 fellowships, awards and scholarships as well as research and training centres.  
53  
54  
55  
56  
57  
58  
59  
60

1  
2  
3 114 Data extracted included scheme name, year first implemented, funding organisation,  
4  
5 115 selection criteria and the relative weight assigned to each criterion. Selection criteria were  
6  
7 116 grouped into five representative domains: relevance (i.e., why should we do it?, including the  
8  
9 117 burden of disease and level of existing knowledge), appropriateness (i.e., should we do it?,  
10  
11 118 including scientific rigour and suitability to answer the research question), significance of  
12  
13 119 research outcomes (i.e., what will we get out of it?, including impact and innovation),  
14  
15 120 feasibility (i.e., can we do it?, including team quality and research environment), and cost-  
16  
17 121 effectiveness (i.e., is the proposed research potentially good value for money?).[7, 10] The  
18  
19 122 domains were selected based on the lists of criteria and categories suggested in two  
20  
21 123 comprehensive tools for research prioritisation, the Essential National Health Research  
22  
23 124 Approach (relevance, appropriateness, feasibility and significance) and the Checklist for  
24  
25 125 Health Research Priority Setting (benefits, feasibility, and cost-effectiveness).[7, 10]  
26  
27 126 Disagreements related to assigning criteria to their representative domains were either  
28  
29 127 resolved by discussion or the involvement of a third reviewer who was provided with the full  
30  
31 128 assessment or selection criteria for consensus decision-making. A domain was counted under  
32  
33 129 a given scheme if at least one criterion within that domain is reported in the selection criteria  
34  
35 130 of that scheme. Table 1 provides a description of the representative domains.

36  
37  
38  
39  
40  
41 131 **Table 1: Description of domains and relevant criteria**[7, 10]

| Domain                    | Definition                                                                                                                                                                                                                                                                                                      |
|---------------------------|-----------------------------------------------------------------------------------------------------------------------------------------------------------------------------------------------------------------------------------------------------------------------------------------------------------------|
| <b>Relevance</b>          | The key question for this domain is “why should we do it?” The proposed research is pertinent to the health problems of interest. It takes into consideration burden of disease, equity, alignment with national/organisational objectives and the level of existing knowledge in relation to the intervention. |
| <b>Appropriateness</b>    | The key question for this domain is “should we do it?” The proposed research is well suited to answer the decision problem. It takes into consideration ethical, moral and legal acceptability, and scientific rigor.                                                                                           |
| <b>Significance</b>       | The key question for this domain is “what will we get out of it?” It represents the benefit of implementing/translating the research results. It takes into consideration the impact on health, innovation, and ability to foster capacity building and collaboration.                                          |
| <b>Feasibility</b>        | The key question for this domain is “can we do it?” The focus is on the chances of research success. It considers team quality (track record) and capability, research environment, and the research plan.                                                                                                      |
| <b>Cost-effectiveness</b> | The key question for this domain is “is the research cost-effective?” This theme focuses on the                                                                                                                                                                                                                 |



|  |                                                                                                                |
|--|----------------------------------------------------------------------------------------------------------------|
|  | value for money of the research proposal. It considers the costs and expected benefits of conducting research. |
|--|----------------------------------------------------------------------------------------------------------------|

132

133 **RESULTS**

134

135 Thirty-six schemes met our inclusion criteria from 158 schemes listed on the 2017

136 ACGR. Figure 1 summarises the review process.

137

**Fig1: Flowchart of the review**

138 One half of the schemes were under the NHMRC. Five schemes (14%) were

139 specifically for research in cancer, four (11%) for dementia, four (11%) for mental health,

140 and three (8%) for diabetes. Table 2 summarises the selection criteria for the included

141 schemes with their definitions as reported on the websites of their relevant funding

142 organisations. A summary of the selection criteria considered by each scheme is presented in

143 Table

3.

**Table 2: Summary of selection criteria and scoring weights of the included schemes**

| Agency | Scheme name                                                    | Year listed | Assessment criteria                                                                                                                | Score  |
|--------|----------------------------------------------------------------|-------------|------------------------------------------------------------------------------------------------------------------------------------|--------|
| NHMRC  | Partnership Projects[14]                                       | 2017        | Track record of investigators relative to opportunity                                                                              | 25%    |
|        |                                                                |             | Scientific quality of the proposal and methodology                                                                                 | 25%    |
|        |                                                                |             | Relevance and likelihood to influence health and research policy and practice                                                      | 25%    |
|        |                                                                |             | Strength of partnership                                                                                                            | 25%    |
| NHMRC  | Program Grants[15]                                             | 2017        | Team research achievements (publications, grants, awards)                                                                          | 60%    |
|        |                                                                |             | Research strategy (quality, addresses important issues, impact, innovation, achievable)                                            | 20%    |
|        |                                                                |             | Collaborative gain (team integration, training and mentoring)                                                                      | 20%    |
| NHMRC  | Project Grants[16]                                             | 2017        | Scientific quality (research plan clarity, appropriateness and feasibility)                                                        | 50%    |
|        |                                                                |             | Significance of outcomes and/or innovation of the concept (advance knowledge, outcomes, translation, publications)                 | 25%    |
|        |                                                                |             | Team quality and capability relative to opportunity (expertise, reputation, achievements)                                          | 25%    |
| NHMRC  | Global Alliance for Chronic Diseases (GACD) <sup>a[17]</sup>   | 2014        | Relevance and quality of project (scheme objectives, appropriate and feasible methods, innovative, ethical)                        | 25%    |
|        |                                                                |             | Quality of team (high quality track-record, capacity building, public engagement)                                                  | 25%    |
|        |                                                                |             | Implementation plans/feasibility (challenges identified, inequality gaps considered)                                               | 25%    |
|        |                                                                |             | Potential impact (outcome utilization, economic impact assessed)                                                                   | 25%    |
| NHMRC  | NHMRC's Targeted Call for Research Program <sup>b[18-22]</sup> | 2013        | Scientific quality and likelihood to answer the research question(s) (relevant, feasible consumers engaged)                        | 40-60% |
|        |                                                                |             | Whether the team has all the necessary skills and expertise to achieve the expected outcomes                                       | 20-50% |
|        |                                                                |             | Significance of the project and expected outcomes                                                                                  | 0-40%  |
| NHMRC  | Dementia Research Team Grants[23]                              | 2014        | Generate new knowledge that leads to improved health outcomes (clarity, quality of methods, feasibility, innovation)               | 25%    |
|        |                                                                |             | Record of research and translation achievement - relative to opportunity (contribution to the field of research, research outputs) | 25%    |
|        |                                                                |             | Facilitate collaboration (collaboration, integration and cohesiveness of the team)                                                 | 20%    |
|        |                                                                |             | Promote effective transfer of outcomes into health policy and/or practice (quality of the plan, involvement of end user)           | 20%    |
|        |                                                                |             | Develop the health and medical research workforce                                                                                  | 10%    |
| NHMRC  | Development Grants[24]                                         | 2017        | Scientific merit of the proposal (quality of the scientific research)                                                              | 40%    |
|        |                                                                |             | Record of commercial achievements (relative to opportunity)                                                                        | 20%    |
|        |                                                                |             | Commercial potential (high impact, innovation, relevant to schemes objectives)                                                     | 40%    |
| NHMRC  | National Institute for Dementia Research Grants[25]            | 2015        | Relevance to the aims of the round and significance of outcomes (relevant to scheme objectives, potential to improve outcomes)     | 30%    |
|        |                                                                |             | Project design, methods and analyses (feasible and suitable environment, consumers and clinicians engaged)                         | 30%    |
|        |                                                                |             | Budget justification and value for money (proposal demonstrates that it is cost effective)                                         | 15%    |

|                                         |                                                                                    |      |                                                                                                                                   |       |
|-----------------------------------------|------------------------------------------------------------------------------------|------|-----------------------------------------------------------------------------------------------------------------------------------|-------|
|                                         |                                                                                    |      | Team quality and capability relevant to the project (team capacity, ability, and expertise)                                       | 25%   |
| NHMRC                                   | NHMRC/NSFC, Prediction and Treatment of Type 2 Diabetes in China and Australia[26] | 2015 | Scientific quality of the project including feasibility (fits within aims of the scheme, feasible, appropriate methods)           | 25%   |
|                                         |                                                                                    |      | Significance of the expected outcomes (impact on health, advance knowledge)                                                       | 25%   |
|                                         |                                                                                    |      | Track record of the team (team capability, track-record)                                                                          | 25%   |
|                                         |                                                                                    |      | Added value of international collaboration (collaboration, transfer of knowledge)                                                 | 25%   |
|                                         |                                                                                    |      |                                                                                                                                   |       |
| NHMRC                                   | Northern Australia Tropical Disease Collaborative Research Program[27]             | 2016 | Generate new knowledge that leads to improved health outcomes                                                                     | 20%   |
|                                         |                                                                                    |      | Promote effective transfer of research outcomes into health policy and/or practice                                                | 20%   |
|                                         |                                                                                    |      | Develop the health and medical research workforce                                                                                 | 20%   |
|                                         |                                                                                    |      | Facilitate collaboration                                                                                                          | 20%   |
|                                         |                                                                                    |      | Record of research and translation achievements - relative to opportunity                                                         | 20%   |
| NHMRC                                   | Translational Research Projects[28]                                                | 2017 | Significant relevance to the health system                                                                                        | NA    |
|                                         |                                                                                    |      | Inform evidence-based improvement to health care                                                                                  | NA    |
|                                         |                                                                                    |      | Outcomes for patients, and/or efficiency in healthcare and/or cost savings                                                        | NA    |
|                                         |                                                                                    |      | Includes a plan for dissemination of results within the healthcare sector                                                         | NA    |
|                                         |                                                                                    |      | Represents value for money                                                                                                        | NA    |
|                                         |                                                                                    |      | Excellent level research team                                                                                                     | NA    |
| NHMRC                                   | Boosting Dementia Research Grants[29]                                              | 2017 | Relevance to the aims of the round and significance of expected outcomes                                                          | 30%   |
|                                         |                                                                                    |      | Project design, methods and analyses (clear, coherent, involvement with consumers, innovation, feasible, translation/impact)      | 30%   |
|                                         |                                                                                    |      | Project justification and value for money (demonstrate value for money)                                                           | 15%   |
|                                         |                                                                                    |      | Team quality and capability relevant to the project (team strength, reputation, contributions)                                    | 25%   |
| Department of Foreign Affairs and Trade | Tropical Disease Research Regional Collaboration Initiative[30]                    | 2017 | Activity effectiveness and value for money (strengthen research capability and collaboration, clear objectives, budget justified) | 50%   |
|                                         |                                                                                    |      | Organisational effectiveness (record of strengthening research collaboration)                                                     | 50%   |
| Cancer Australia                        | Priority-Driven Collaborative Cancer Scheme[31]                                    | 2017 | Team quality and capability relevant to the application                                                                           | 40%   |
|                                         |                                                                                    |      | Outcomes and impact of current proposal                                                                                           | 25%   |
|                                         |                                                                                    |      | Translation of research                                                                                                           | 10%   |
|                                         |                                                                                    |      | Collaborations                                                                                                                    | 15%   |
|                                         |                                                                                    |      | Consumer involvement                                                                                                              | 10%   |
| Cancer Australia                        | Support for Cancer Clinical Trials Program Grant[32]                               | 2013 | National multi-disciplinary membership, governance structure, data and quality, capacity building, collaboration, translation     | 33.3% |
|                                         |                                                                                    |      | How the funding will be utilized                                                                                                  | 33.3% |
|                                         |                                                                                    |      | Budget and value for money                                                                                                        | 33.3% |
| Alzheimer's                             | Dementia Grants                                                                    | 2017 | Scientific merit and quality (relevance, clarity and suitability of methods and plan)                                             | 50%   |

|                                                            |                                                   |      |                                                                                                            |     |
|------------------------------------------------------------|---------------------------------------------------|------|------------------------------------------------------------------------------------------------------------|-----|
| Australia Dementia Research Foundation                     | Program[33]                                       |      | Track record and independence of the applicant                                                             | 30% |
|                                                            |                                                   |      | Innovation/originality                                                                                     | 20% |
|                                                            |                                                   |      | The Scientific Panel will also consider the feasibility of proposed projects                               |     |
| Australian and New Zealand College of Anaesthetists        | Project Grants[34]                                | 2017 | Scientific merit, design/methods, track record, originality, feasibility and international competitiveness | NA  |
| Australian Rotary Health                                   | Mental Health Research Grants[35]                 | 2017 | Scientific excellence of the project                                                                       | NA  |
|                                                            |                                                   |      | Innovation of the project                                                                                  | NA  |
|                                                            |                                                   |      | Track record of the applicant                                                                              | NA  |
|                                                            |                                                   |      | Feasibility, including relevant partnerships                                                               | NA  |
| Bupa Foundation (Australia) Limited                        | Bupa Health Foundation[36]                        | 2017 | Practical benefits to the mental health of the community                                                   | NA  |
|                                                            |                                                   |      | Direct impact on health outcomes                                                                           | NA  |
|                                                            |                                                   |      | Timing of delivery of results                                                                              | NA  |
|                                                            |                                                   |      | Justification of funding                                                                                   | NA  |
| Cure for MND Foundation                                    | Translational Research Grants[37]                 | 2017 | Study/program design                                                                                       | NA  |
|                                                            |                                                   |      | Reputation of organisation                                                                                 | NA  |
|                                                            |                                                   |      | Research strategy and feasibility                                                                          | 50% |
|                                                            |                                                   |      | Impact and transition potential                                                                            | 25% |
| Diabetes Australia Research Trust                          | General Grants[38]                                | 2017 | Personnel and budget                                                                                       | 25% |
|                                                            |                                                   |      | Research methods and quality                                                                               | 40% |
| Healthway (Western Australian Health Promotion Foundation) | Health Promotion Intervention Research Grants[39] | 2017 | Potential research outcomes                                                                                | 60% |
|                                                            |                                                   |      | Ability to directly improve health and community outcomes in priority health areas                         | NA  |
|                                                            |                                                   |      | Contribution of the research to best practice in health promotion                                          | NA  |
|                                                            |                                                   |      | The quality of the translation plan                                                                        | NA  |
|                                                            |                                                   |      | End-user partnerships and collaboration                                                                    | NA  |
|                                                            |                                                   |      | Soundness of rationale and methodology                                                                     | NA  |
| HCF Research Foundation                                    | Health Services Research Grants[40]               | 2017 | Track record and capability of research team                                                               | NA  |
|                                                            |                                                   |      | Appropriateness of the budget, and overall value for money                                                 | NA  |
|                                                            |                                                   |      | Scientific merit (design, methodology, feasibility, budget)                                                | 40% |
| Motor Neurone Disease Research Institute of Australia      | Grants-in-aid[41]                                 | 2017 | Relevance to HCF objectives (translation, response to knowledge gaps, improve health)                      | 40% |
|                                                            |                                                   |      | General (repeat other studies/ongoing studies, burden of disease)                                          | 20% |
|                                                            |                                                   |      | Track record of the applicant                                                                              | NA  |
| Multiple Sclerosis Research Australia                      | Research Grants[42]                               | 2017 | Strength of the research plan                                                                              | NA  |
|                                                            |                                                   |      | Relevance to Motor Neurone Disease                                                                         | NA  |
| Multiple Sclerosis Research Australia                      | Research Grants[42]                               | 2017 | Relevance to Multiple Sclerosis                                                                            | NA  |
|                                                            |                                                   |      | Significance (value and novelty)                                                                           | NA  |

|                                         |                                         |      |                                                                                                                       |     |
|-----------------------------------------|-----------------------------------------|------|-----------------------------------------------------------------------------------------------------------------------|-----|
|                                         |                                         |      | Feasibility of methods                                                                                                | NA  |
|                                         |                                         |      | Track record of applicants                                                                                            | NA  |
| National Breast Cancer Foundation       | Innovator Grant [43]                    | 2017 | Novelty of the project                                                                                                | 50% |
|                                         |                                         |      | Track record of applicant                                                                                             | 20% |
|                                         |                                         |      | Quality and feasibility                                                                                               | 20% |
|                                         |                                         |      | Relevance to National Breast Cancer Foundation research priorities                                                    | 10% |
| National Breast Cancer Foundation       | Accelerator Research Grant[44]          | 2016 | Translational potential and impact on breast cancer outcomes                                                          | 50% |
|                                         |                                         |      | Track record of applicant team                                                                                        | 20% |
|                                         |                                         |      | Scientific quality and feasibility                                                                                    | 20% |
|                                         |                                         |      | Relevance to National Breast Cancer Foundation research priorities                                                    | 10% |
| National Heart Foundation               | Vanguard Grant[45]                      | 2017 | Track record of applicants                                                                                            | NA  |
|                                         |                                         |      | How well the application addresses the purpose of the award                                                           | NA  |
|                                         |                                         |      | Quality of the research proposal                                                                                      | NA  |
|                                         |                                         |      | Feasibility of the research proposal                                                                                  | NA  |
|                                         |                                         |      | Potential to produce tangible outcomes                                                                                | NA  |
| Prostate Cancer Foundation of Australia | New Concept Grant[46]                   | 2017 | Track record of investigator team                                                                                     | NA  |
|                                         |                                         |      | Scientific and technical merit of the research question, feasibility, design and methodology.                         | NA  |
|                                         |                                         |      | Innovation                                                                                                            | NA  |
|                                         |                                         |      | Potential impact on prostate cancer                                                                                   | NA  |
|                                         |                                         |      | Research environment (suitability, expertise and collaboration)                                                       | NA  |
| The Movember Group and Beyondblue       | Australian Mental Health Initiative[47] | 2013 | Alignment and fit with Movember’s strategic goals                                                                     | NA  |
|                                         |                                         |      | Significance/innovation of the project (advance management, address significant areas)                                | NA  |
|                                         |                                         |      | Project proposal (clarity, achievability, collaboration, consultation with stakeholders, plan, knowledge translation) | NA  |
|                                         |                                         |      | The project team (proven expertise, capability, record)                                                               | NA  |

NHMRC: National Health and Medical Research Council, NSFC: National Natural Science Foundation of China, MND: Motor Neurone Disease, HCF: The Hospitals Contribution Fund of Australia.

<sup>a</sup> Global Alliance for Chronic Disease Grants include: Request for Applications on Type 2 Diabetes in Low and Middle Income Countries, Request for Applications on the Prevention and Management of Chronic Lung Disease in Middle and Low Income Countries and Indigenous Communities in Australia and Canada, Request for Prevention and Management of Mental Disorders in Low and Middle Income Countries and Indigenous Communities in High Income Countries.

<sup>b</sup> Targeted calls include: Targeted Call for Research into Wind Farms and Human Health, Targeted Call for Research into Preparing Australia for the Genomics Revolution in Health Care, Targeted Call for Research into Engaging and Retaining Young Adults in Interventions to Improve Eating Behaviours and Health Outcomes, Targeted Call for Research into Fetal Alcohol Spectrum Disorder among Aboriginal and Torres Strait Islander Peoples, Targeted Call for Research into Mental Health : Suicide Prevention in Aboriginal and Torres Strait Islander Peoples

1  
2  
3  
4  
5 154

**Table 3: Selection criteria domains for schemes and funding organisations**

| Organisation and Scheme Name                                                                       | Relevance |                                    |                    | Appropriateness    |               |               | Significance      |                            |                               | Feasibility           |             |                       |               | Cost-effectiveness   |                 |   |
|----------------------------------------------------------------------------------------------------|-----------|------------------------------------|--------------------|--------------------|---------------|---------------|-------------------|----------------------------|-------------------------------|-----------------------|-------------|-----------------------|---------------|----------------------|-----------------|---|
|                                                                                                    | Burden    | National/Organisational Priorities | Existing Knowledge | Scientific Quality | Answerability | Ethical/Moral | Innovation Impact | Translation/Implementation | Foster Capacity/Collaboration | Research Team Quality | Environment | Stakeholders Involved | Research Plan | Budget Justification | Value for Money |   |
| <b>NHMRC</b>                                                                                       |           |                                    |                    |                    |               |               |                   |                            |                               |                       |             |                       |               |                      |                 |   |
| Boosting Dementia Research Grants                                                                  | -         | ✓                                  | -                  | ✓                  | -             | -             | ✓                 | ✓                          | ✓                             | -                     | ✓           | -                     | ✓             | ✓                    | ✓               | ✓ |
| Dementia Research Team Grants                                                                      | -         | ✓                                  | ✓                  | ✓                  | ✓             | -             | ✓                 | ✓                          | ✓                             | ✓                     | ✓           | -                     | ✓             | ✓                    | -               | - |
| Development Grants                                                                                 | ✓         | ✓                                  | -                  | ✓                  | -             | -             | ✓                 | ✓                          | ✓                             | -                     | ✓           | ✓                     | -             | ✓                    | -               | - |
| Global Alliance for Chronic Diseases- Chronic Lung Disease                                         | -         | ✓                                  | ✓                  | ✓                  | ✓             | -             | ✓                 | ✓                          | ✓                             | -                     | ✓           | -                     | ✓             | ✓                    | -               | - |
| Global Alliance for Chronic Diseases- Mental Disorders                                             | -         | ✓                                  | ✓                  | ✓                  | ✓             | ✓             | ✓                 | ✓                          | ✓                             | -                     | ✓           | -                     | ✓             | ✓                    | -               | - |
| Global Alliance for Chronic Diseases-Type 2 Diabetes Countries                                     | -         | ✓                                  | ✓                  | ✓                  | ✓             | -             | ✓                 | ✓                          | ✓                             | -                     | ✓           | -                     | ✓             | ✓                    | -               | - |
| National Institute for Dementia Research Grants                                                    | -         | ✓                                  | -                  | ✓                  | ✓             | -             | ✓                 | ✓                          | ✓                             | -                     | ✓           | ✓                     | ✓             | ✓                    | ✓               | ✓ |
| NHMRC/NSFC - Prediction and Treatment of Type 2 Diabetes                                           | -         | ✓                                  | -                  | ✓                  | ✓             | -             | -                 | ✓                          | ✓                             | ✓                     | ✓           | ✓                     | -             | ✓                    | -               | - |
| Northern Australia Tropical Disease Collaborative Research Programme                               | -         | -                                  | -                  | ✓                  | ✓             | -             | ✓                 | ✓                          | ✓                             | ✓                     | ✓           | -                     | ✓             | ✓                    | -               | - |
| Partnership Projects                                                                               | -         | -                                  | -                  | ✓                  | ✓             | -             | ✓                 | ✓                          | ✓                             | -                     | ✓           | -                     | -             | ✓                    | -               | - |
| Program Grants                                                                                     | ✓         | -                                  | -                  | ✓                  | -             | -             | ✓                 | ✓                          | ✓                             | ✓                     | ✓           | ✓                     | -             | ✓                    | -               | - |
| Project Grants                                                                                     | -         | -                                  | -                  | ✓                  | -             | -             | ✓                 | ✓                          | ✓                             | -                     | ✓           | -                     | -             | ✓                    | -               | - |
| Targeted Call - Engaging Young Adults to Improve Eating Behaviours and Health Outcomes             | -         | ✓                                  | -                  | ✓                  | ✓             | -             | -                 | ✓                          | ✓                             | -                     | ✓           | -                     | ✓             | ✓                    | -               | - |
| Targeted Call – Mental Health : Suicide Prevention in Aboriginal and Torres Strait Islander Youth  | -         | -                                  | -                  | ✓                  | ✓             | -             | -                 | ✓                          | ✓                             | -                     | ✓           | -                     | ✓             | ✓                    | -               | - |
| Targeted Call- Fetal Alcohol Spectrum Disorder among Aboriginal and Torres Strait Islander Peoples | -         | -                                  | ✓                  | ✓                  | ✓             | -             | -                 | ✓                          | -                             | -                     | ✓           | -                     | ✓             | ✓                    | -               | - |
| Targeted Call- Preparing Australia for the Genomics Revolution                                     | -         | ✓                                  | -                  | ✓                  | ✓             | -             | -                 | ✓                          | ✓                             | -                     | ✓           | -                     | ✓             | ✓                    | -               | - |

46  
47

1  
2  
3  
4  
5  
6  
7  
8  
9  
10  
11  
12  
13  
14  
15  
16  
17  
18  
19  
20  
21  
22  
23  
24  
25  
26  
27  
28  
29  
30  
31  
32  
33  
34  
35  
36  
37  
38  
39  
40  
41  
42  
43  
44  
45  
46  
47

|                                                                                          |   |   |   |   |   |   |   |   |   |   |   |   |   |   |   |   |
|------------------------------------------------------------------------------------------|---|---|---|---|---|---|---|---|---|---|---|---|---|---|---|---|
| Targeted Call-Wind Farms and Human Health                                                | - | ✓ | - | ✓ | ✓ | - | - | ✓ | ✓ | - | ✓ | - | ✓ | ✓ | - | - |
| Translational Research Projects for Improved Health Care                                 | - | ✓ | - | - | - | - | - | ✓ | - | - | ✓ | - | - | ✓ | - | ✓ |
| <b>Cancer Australia</b>                                                                  |   |   |   |   |   |   |   |   |   |   |   |   |   |   |   |   |
| Priority-Driven Collaborative Cancer Scheme                                              | - | ✓ | - | - | - | - | - | ✓ | ✓ | ✓ | ✓ | - | ✓ | - | - | - |
| Support for Cancer Clinical Trials Program-Existing National Cooperative Oncology Groups | - | - | - | ✓ | - | - | - | - | ✓ | ✓ | - | - | - | ✓ | ✓ | ✓ |
| <b>National Breast Cancer Foundation</b>                                                 |   |   |   |   |   |   |   |   |   |   |   |   |   |   |   |   |
| Accelerator Research Grant                                                               | - | ✓ | - | ✓ | - | - | - | ✓ | ✓ | - | ✓ | - | - | ✓ | - | - |
| Innovator Grant                                                                          | - | ✓ | - | ✓ | - | - | - | ✓ | ✓ | - | - | ✓ | - | - | ✓ | - |
| <b>Department of Foreign Affairs and Trade</b>                                           |   |   |   |   |   |   |   |   |   |   |   |   |   |   |   |   |
| Tropical Disease Research Regional Collaboration Initiative                              | - | ✓ | - | ✓ | ✓ | - | - | ✓ | ✓ | ✓ | ✓ | - | - | ✓ | ✓ | ✓ |
| <b>Alzheimer’s Australia Dementia Research Foundation</b>                                |   |   |   |   |   |   |   |   |   |   |   |   |   |   |   |   |
| Dementia Grants Program                                                                  | - | - | - | ✓ | ✓ | - | - | ✓ | ✓ | - | - | ✓ | - | - | ✓ | - |
| <b>Australian and New Zealand College of Anaesthetists</b>                               |   |   |   |   |   |   |   |   |   |   |   |   |   |   |   |   |
| ANZCA Research Grants Program                                                            | - | - | - | ✓ | - | - | - | - | - | - | ✓ | - | - | ✓ | - | - |
| <b>Australian Rotary Health</b>                                                          |   |   |   |   |   |   |   |   |   |   |   |   |   |   |   |   |
| Mental Health Research Grants                                                            | - | - | - | ✓ | - | - | - | ✓ | ✓ | - | - | ✓ | - | - | ✓ | - |
| <b>Bupa Foundation</b>                                                                   |   |   |   |   |   |   |   |   |   |   |   |   |   |   |   |   |
| Bupa Health Foundation                                                                   | - | - | - | - | - | - | - | ✓ | - | - | ✓ | - | - | ✓ | - | - |
| <b>Cure for MND Foundation</b>                                                           |   |   |   |   |   |   |   |   |   |   |   |   |   |   |   |   |
| Translational Research Grants                                                            | - | - | - | ✓ | - | - | - | ✓ | ✓ | - | ✓ | ✓ | - | ✓ | - | - |
| <b>Diabetes Australia Research Trust</b>                                                 |   |   |   |   |   |   |   |   |   |   |   |   |   |   |   |   |
| General Grants                                                                           | - | - | ✓ | ✓ | - | - | - | ✓ | ✓ | ✓ | - | ✓ | - | - | ✓ | - |
| <b>Healthway (Western Australian Health Promotion Foundation)</b>                        |   |   |   |   |   |   |   |   |   |   |   |   |   |   |   |   |
| Health Promotion Intervention Research Grants                                            | - | ✓ | ✓ | ✓ | - | - | - | ✓ | ✓ | ✓ | ✓ | - | ✓ | ✓ | ✓ | ✓ |
| <b>HCF Research Foundation</b>                                                           |   |   |   |   |   |   |   |   |   |   |   |   |   |   |   |   |
| Health Services Research Grants                                                          | ✓ | ✓ | ✓ | ✓ | - | - | - | ✓ | ✓ | - | - | - | - | ✓ | - | - |
| <b>Motor Neurone Disease Research Institute of Australia</b>                             |   |   |   |   |   |   |   |   |   |   |   |   |   |   |   |   |
| Motor Neurone Disease Research Grants                                                    | - | ✓ | - | ✓ | - | - | - | - | - | - | ✓ | - | - | - | - | - |
| <b>Multiple Sclerosis Research Australia</b>                                             |   |   |   |   |   |   |   |   |   |   |   |   |   |   |   |   |
| Research Grants                                                                          | - | ✓ | - | ✓ | ✓ | - | - | ✓ | ✓ | - | - | ✓ | - | - | ✓ | - |
| <b>National Heart Foundation of Australia</b>                                            |   |   |   |   |   |   |   |   |   |   |   |   |   |   |   |   |
| Vanguard Grants                                                                          | - | ✓ | - | ✓ | - | - | - | ✓ | ✓ | - | - | ✓ | ✓ | - | ✓ | - |
| <b>Prostate Cancer Foundation of Australia</b>                                           |   |   |   |   |   |   |   |   |   |   |   |   |   |   |   |   |

1  
2  
3  
4  
5  
6  
7  
8  
9  
10  
11  
12  
13  
14  
15  
16  
17  
18  
19  
20  
21  
22  
23  
24  
25  
26  
27  
28  
29  
30  
31  
32  
33  
34  
35  
36  
37  
38  
39  
40  
41  
42  
43  
44  
45  
46  
47

|                                          |   |   |   |   |   |   |   |   |   |   |   |   |   |   |   |   |
|------------------------------------------|---|---|---|---|---|---|---|---|---|---|---|---|---|---|---|---|
| New Concept Grant                        | - | - | - | ✓ | - | - | ✓ | ✓ | - | - | ✓ | ✓ | - | ✓ | - | - |
| <b>The Movember Group and beyondblue</b> |   |   |   |   |   |   |   |   |   |   |   |   |   |   |   |   |
| Australian Mental Health Initiative      | - | ✓ | - | ✓ | ✓ | - | ✓ | ✓ | ✓ | - | ✓ | - | ✓ | ✓ | - | - |

NHMRC: National Health and Medical Research Council, NSFC: National Natural Science Foundation of China, ANZCA: Australian and New Zealand College of Anaesthetists, MND: Motor Neurone Disease, HCF: The Hospitals Contribution Fund of Australia.

For peer review only



1 166 The most commonly used criteria were research team quality and capability (94%),  
2  
3 167 research plan clarity (94%), scientific quality of the proposal (92%) and research impact  
4  
5 168 (92%). Criteria considered less commonly were existing knowledge (22%), fostering  
6  
7 169 collaboration (22%), research environment (19%), budget justification (17%), value for  
8  
9 170 money (14%), disease burden (8%) and ethical/moral considerations (3%). When selection  
10  
11 171 criteria were grouped into relevant domains, all schemes considered feasibility criteria, 94%  
12  
13 172 of the schemes considered significance, 92% considered appropriateness, 72% considered  
14  
15 173 relevance, and only 17% considered cost-effectiveness. Only five schemes (14%) considered  
16  
17 174 all five domains; namely, NHMRC National Institute for Dementia Research Grants,  
18  
19 175 NHMRC Boosting Dementia Research Grants, Cancer Australia Clinical Trials Program, and  
20  
21 176 the Department of Foreign Affairs and Trade Tropical Disease Research, and Health  
22  
23 177 Promotion Intervention Research Grants. Figure 2 depicts the distribution of selection  
24  
25 178 criteria.

### 179 **Fig2: Overall research criteria and their representative domains**

30  
31  
32  
33 180 When reported, the relative weights for the selection criteria also varied across  
34  
35 181 schemes with 20-75% for feasibility, 20-60% for each appropriateness and significance, 15-  
36  
37 182 33% for value for money and 5-30% for relevance criteria.

## 38 39 40 **DISCUSSION**

41 184 A broad range of criteria were reported in the included research funding schemes with  
42  
43 185 a clear focus on the quality of the research team, research plan, scientific rigor, impact, and  
44  
45 186 translation/implementation potential. The identified schemes, within the same organisation  
46  
47 187 and across organisations, had variable selection criteria and scoring weights. When grouped  
48  
49 188 into representative domains, funding organisations in Australia appear to focus on research  
50  
51 189 relevance, quality, impact, and feasibility; however, cost-effectiveness of research projects  
52  
53 190 was largely overlooked.  
54  
55  
56  
57  
58  
59  
60

1 191 Using a predefined set of selection criteria is a transparent approach to select and  
2  
3 192 prioritise high quality research projects for funding. The choice of criteria and their weights  
4  
5 193 should depend on the purpose of the scheme and the organisational objectives.[7, 10] For  
6  
7 194 instance, collaborative and partnership schemes focused on partnership strengths,  
8  
9 195 collaborative gains, and team integration. Importantly, selection criteria and their scoring  
10  
11 196 systems should be clear to both applicants and evaluators; therefore, it is vital to have  
12  
13 197 clarifying statements (i.e., definitions) that can be quantitatively scored.[10] The definitions  
14  
15 198 and the level of the details to clarify the selection criteria varied across the schemes. Notably,  
16  
17 199 most of the schemes use sub-criteria (i.e. subsets) to define or explain a major criterion for  
18  
19 200 which a scoring weight was assigned. For instance, criteria such as capability, time, and track  
20  
21 201 record were collectively used to define research team quality. Moreover, it was common to  
22  
23 202 see compound criteria such as research quality and innovation, quality and feasibility, or  
24  
25 203 significance and innovation; however, the contribution of each sub-criterion to the major  
26  
27 204 criterion's weight was not clear. Ideally, these sub-criteria should also have clear scores to  
28  
29 205 guide the overall scoring of the major criterion.[10]  
30  
31  
32  
33

34 206 The criteria used by the Australian funding organisations are in line with the general  
35  
36 207 criteria recommended in leading international initiatives for health research prioritisation [7,  
37  
38 208 9-11]; yet, there are important criteria that were not considered by most of the included  
39  
40 209 schemes. Equity considerations were not explicitly mentioned as a selection criterion, and  
41  
42 210 ethical/moral considerations were only considered in one scheme. This might be explained by  
43  
44 211 the implicit assumptions that all submitted proposals will be approved by ethics committees  
45  
46 212 and that equity is addressed by targeted research grants (e.g., Research in Aboriginal and  
47  
48 213 Torres Strait Islanders). However, without clarity about where the responsibility for ethical  
49  
50 214 and equity considerations lies there is the potential for these criteria to be overlooked.  
51  
52 215 Furthermore, criteria to assess the extent to which a research project encourages gender  
53  
54 216 equality in health research, such as having equal representation of genders, was absent.[48]  
55  
56  
57  
58  
59  
60

1 217 Other criteria were less commonly considered despite their importance in improving research  
2  
3 218 value. For example, the Lancet's Series on reducing waste and increasing value in medical  
4  
5 219 research recommended engaging potential users of research in research prioritisation, and that  
6  
7 220 proposals for additional research are justified by systematic reviews showing what is already  
8  
9 221 known.[4, 5, 49] Notwithstanding, around 40% of the schemes in our study considered  
10  
11 222 stakeholders' involvement (i.e., consumers and/or clinicians); however, the level of  
12  
13 223 stakeholders' engagement and influence on funding decisions was unclear. Despite its  
14  
15 224 importance to avoid research duplication, only 22% of the schemes considered existing  
16  
17 225 knowledge, but none of the schemes explicitly required a systematic review of literature to  
18  
19 226 demonstrate knowledge gaps. Our results echo the findings of a review of the extent to which  
20  
21 227 11 international organisations adopted waste-reducing policies and processes.[3] In that  
22  
23 228 review, only one organisation required reference to relevant systematic reviews in all funding  
24  
25 229 applications and four funders required systematic reviews for funding clinical trials. In  
26  
27 230 addition, public involvement was key for only three funders.[3]

31  
32 231 An important aspect that was also overlooked is the cost-effectiveness of the proposed  
33  
34 232 research projects. Funding organisations may implicitly assume that selecting high quality  
35  
36 233 and high significance projects would ensure value for money; nevertheless, value for money  
37  
38 234 cannot be established without explicitly comparing the costs and expected benefits of  
39  
40 235 proposals competing for funding. Interestingly, none of the schemes that required  
41  
42 236 demonstration of value for money provided guidelines on how the cost-effectiveness of  
43  
44 237 research projects should be performed and presented. Of note, there are rigorous analytical  
45  
46 238 methods to prospectively quantify the expected benefits of research on improving health  
47  
48 239 outcomes, the key analytical approaches are the 'prospective payback of research' (a similar  
49  
50 240 approach to return on investment) and the value of information approach.[6, 50] Under the  
51  
52 241 payback approach, the value of a research study is typically inferred from its ability to result  
53  
54 242 in a beneficial change in clinical practice.[51] The value of information approach, on the  
55  
56  
57  
58  
59  
60

1  
2 243 other hand, considers the uncertainty in the relevant available evidence (e.g., from systematic  
3  
4 244 reviews and meta-analyses) and the consequences of this uncertainty (e.g., implementing a  
5  
6 245 suboptimal intervention).[52] Research benefits calculated by these approaches are scaled up  
7  
8 246 by considering the population expected to benefit from research results over time, and these  
9  
10 247 benefits are compared with research budget to inform cost-effectiveness.[53, 54]

11  
12 248 A limitation to our work is that we only reviewed active grant schemes listed on the  
13  
14 249 ACGR; and therefore, some grant schemes may not have been included in our review;  
15  
16 250 however, the ACGR is a comprehensive registry of major research grants by leading funding  
17  
18 251 organisations in Australia. Additionally, it is noted that selection criteria, and schemes,  
19  
20 252 change over time to meet political and administrative objectives. For example, the NHMRC  
21  
22 253 is revising grant schemes as well as the selection criteria and processes for a new series of  
23  
24 254 grants to commence funding in 2019.[55]

25  
26  
27  
28 255 In conclusion, health care research is vital to improve health; however, there is a need  
29  
30 256 to ensure that funded research is of high quality and value for money. In selecting research  
31  
32 257 projects for funding, Australian research funding organisations focus on research  
33  
34 258 appropriateness, significance and feasibility; nevertheless, other important criteria should not  
35  
36 259 be overlooked such as equity, gender equality, ethics and moral aspects and consumers'  
37  
38 260 involvement. Importantly, research funding decisions should include an assessment of value  
39  
40 261 for money in order to maximise return on research investment.

#### 41 42 43 44 262 **ACKNOWLEDGMENTS**

45  
46 263 The authors acknowledge Menzies Health Institute Queensland, Cancer Council  
47  
48 264 Queensland and the Prostate Cancer Foundation of Australia for funding this project. The  
49  
50 265 authors thank Professor Joanne Aitken for her contribution to this manuscript.

#### 51 52 53 266 **COMPETING INTERESTS**

54  
55  
56 267 The authors have no competing interests.

268 **FUNDING**

269 Haitham Tuffaha is supported by an Australian National Health and Medical Research  
270 Council (NHMRC) fellowship (GNT1121232). This project is funded by Menzies Health  
271 Institute Queensland and the Prostate Cancer Foundation of Australia.

272

273 **REFERENCES**

- 274 1. The Australian Institute of Health and Welfare. Health expenditure Australia 2015–16  
275 [Available from: <https://www.aihw.gov.au/getmedia/3a34cf2c-c715-43a8-be44-0cf53349fd9d/20592.pdf.aspx?inline=true>.  
276
- 277 2. The Australian Government. DoH. Medical Research Future Fund. [Available from:  
278 <http://www.health.gov.au/internet/main/publishing.nsf/Content/mrff>.  
279
- 280 3. Nasser M, Clarke M, Chalmers I, Brurberg KG, Nykvist H, Lund H, et al. What are  
281 funders doing to minimise waste in research? *Lancet*. 2017;389(10073):1006-7.  
282
- 283 4. Moher D, Glasziou P, Chalmers I, Nasser M, Bossuyt PM, Korevaar DA, et al.  
284 Increasing value and reducing waste in biomedical research: who's listening? *Lancet*.  
285 2016;387(10027):1573-86.  
286
- 287 5. Chalmers I, Bracken MB, Djulbegovic B, Garattini S, Grant J, Gülmezoglu AM, et al.  
288 How to increase value and reduce waste when research priorities are set. *The*  
289 *Lancet*. 383(9912):156-65.  
290
- 291 6. Tuffaha HW, Andronis L, Scuffham PA. Setting Medical Research Future Fund  
292 priorities: assessing the value of research. *The Medical journal of Australia*. 2017;206(2):63-  
293 5.  
294
- 295 7. Viergever RF, Olifson S, Ghaffar A, Terry RF. A checklist for health research priority  
296 setting: nine common themes of good practice. *Health Research Policy and Systems*.  
297 2010;8(1):36.  
298
- 299 8. National Health and Medical Research Council. NHMRC Principles of Peer Review  
300 [Available from: [https://www.nhmrc.gov.au/grants-funding/peer-review/nhmrc-principles-  
301 peer-review](https://www.nhmrc.gov.au/grants-funding/peer-review/nhmrc-principles-peer-review).  
302
- 303 9. Rudan I, Gibson J, Kapiriri L, Lansang MA, Hyder AA, Lawn J, et al. Setting  
304 priorities in global child health research investments: assessment of principles and practice.  
305 *Croatian medical journal*. 2007;48(5):595-604.  
306
- 307 10. Okello D CP. The COHRED Working Group on Priority Setting. A manual for  
308 research priority setting using the ENHR Strategy [Available from:  
309 <http://www.cohred.org/downloads/578.pdf>.  
310
- 311 11. Ghaffar A CT, Matlin SA, Olifson S. The 3D combined approach matrix: An  
improved tool for setting priorities in research for health. *The Global Forum for Health  
Research* [Available from:  
[http://www.webcitation.org/query.php?url=http://www.globalforumhealth.org/content/download/7860/50203/file/CAM\\_3D\\_GB.pdf&refdoi=10.1186/1478-4505-8-36](http://www.webcitation.org/query.php?url=http://www.globalforumhealth.org/content/download/7860/50203/file/CAM_3D_GB.pdf&refdoi=10.1186/1478-4505-8-36).  
12. WHO. Ad Hoc Committee on Health Research Relating to Future Intervention  
Options. Investing in health research and development. 1996 [Available from:  
[http://apps.who.int/iris/bitstream/10665/63139/1/TDR\\_GEN\\_96.2.pdf](http://apps.who.int/iris/bitstream/10665/63139/1/TDR_GEN_96.2.pdf).  
13. Australian Competitive Grants Register. [Available from:  
<https://www.education.gov.au/australian-competitive-grants-register>.

- 1  
2  
3  
4  
5  
6  
7  
8  
9  
10  
11  
12  
13  
14  
15  
16  
17  
18  
19  
20  
21  
22  
23  
24  
25  
26  
27  
28  
29  
30  
31  
32  
33  
34  
35  
36  
37  
38  
39  
40  
41  
42  
43  
44  
45  
46  
47  
48  
49  
50  
51  
52  
53  
54  
55  
56  
57  
58  
59  
60
14. National Health and Medical Research Council-Partnership Projects [Available from: <https://www.nhmrc.gov.au/book/nhmrc-funding-rules-2017/nhmrc-funding-rules-2017/partnership-projects-scheme-specific-3>].
  15. National Health and Medical Research Council-Program Grants [Available from: <https://www.nhmrc.gov.au/book/nhmrc-funding-rules-2017/program-grants-scheme-specific-funding-rules-funding-commencing-2019/4>].
  16. National Health and Medical Research Council-Project Grants [Available from: <https://www.nhmrc.gov.au/book/nhmrc-funding-rules-2017/project-grants-scheme-specific-funding-rules-funding-commencing-2018/4>].
  17. National Health and Medical Research Council-Global Alliance for Chronic Diseases (GACD) [Available from: <https://www.nhmrc.gov.au/book/nhmrc-funding-rules-2017/global-alliance-chronic-diseases-gacd-scheme-specific-funding-rules/4>].
  18. National Health and Medical Research Council-Targeted Call for Research into Wind Farms and Human Health [Available from: <https://www.nhmrc.gov.au/book/8-assessment-applications-0>].
  19. National Health and Medical Research Council-Targeted Call for Research into Preparing Australia for the Genomics Revolution in Health Care (Genomics TCR) [Available from: <https://www.nhmrc.gov.au/book/8-assessment-applications>].
  20. National Health and Medical Research Council-Targeted Call for Research into Engaging and Retaining Young Adults [Available from: <https://www.nhmrc.gov.au/book/8-assessment-applications-1>].
  21. National Health and Medical Research Council-"Targeted Call for Research into Fetal Alcohol Spectrum Disorder among Aboriginal and Torres Strait Islander Peoples " [Available from: <https://www.nhmrc.gov.au/grants-funding/apply-funding/targeted-and-urgent-calls-research/fetal-alcohol-spectrum-disorder-ta-0>].
  22. National Health and Medical Research Council-Targeted Call for Research into MENTAL HEALTH : Suicide Prevention in Aboriginal and Torres Strait Islander Youth [
  23. National Health and Medical Research Council-Dementia Research Team Grants [Available from: <https://www.nhmrc.gov.au/book/nhmrc-funding-rules/section-o-dementia-research-team-grants/o6-assessment>].
  24. National Health and Medical Research Council-Development Grants [Available from: <https://www.nhmrc.gov.au/book/nhmrc-funding-rules-2017/development-grants-scheme-specific-funding-rules-funding-commencing/4>].
  25. National Health and Medical Research Council-NHMRC National Institute for Dementia Research Grants [Available from: <https://www.nhmrc.gov.au/book/5-assessment-criteria-0>].
  26. National Health and Medical Research Council-NHMRC/NSFC Joint Call for Research to Enhance Prediction and Improve the Treatment of Type 2 Diabetes in China and Australia [Available from: <https://www.nhmrc.gov.au/book/3-assessment-criteria-1>].
  27. National Health and Medical Research Council-Northern Australia Tropical Disease Collaborative Research Programme-specific [Available from: <https://www.nhmrc.gov.au/book/nhmrc-funding-rules-2016/NHMRC-funding-rules-2016/0rthern-australia-tropical-disease/3>].
  28. National Health and Medical Research Council-Translational Research Projects for Improved Health Care [Available from: [https://www.nhmrc.gov.au/files\\_nhmrc/file/research/translational\\_research\\_projects\\_v11.pdf](https://www.nhmrc.gov.au/files_nhmrc/file/research/translational_research_projects_v11.pdf)].
  29. National Health and Medical Research Council-Boosting Dementia Research Grants [Available from: <https://www.nhmrc.gov.au/book/nhmrc-funding-rules-2017/nhmrc-funding-rules-2017/boosting-dementia-research-grants-scheme/3>].

- 1 362 30. Department of Foreign Affairs and Trade-Tropical Disease Research Regional  
2 363 Collaboration Initiative [Available from: Tropical Disease Research Regional Collaboration  
3 364 Initiative.
- 4 365 31. Cancer Australia-Priority-Driven Collaborative Cancer Scheme [Available from:  
5 366 [https://canceraustralia.gov.au/sites/default/files/2017\\_round\\_pdccrs\\_grant\\_guidelines\\_rules\\_f](https://canceraustralia.gov.au/sites/default/files/2017_round_pdccrs_grant_guidelines_rules_f)  
6 367 [or\\_applicants\\_standard\\_project\\_grants\\_161221\\_2.pdf](https://canceraustralia.gov.au/sites/default/files/2017_round_pdccrs_grant_guidelines_rules_f).
- 7 368 32. Cancer Australia-Support for Cancer Clinical Trials Program-Existing National  
8 369 Cooperative Oncology Groups [Available from:  
9 370 [https://canceraustralia.gov.au/sites/default/files/publications/grant\\_guidelines.pdf](https://canceraustralia.gov.au/sites/default/files/publications/grant_guidelines.pdf).
- 10 371 33. Alzheimer's Australia Dementia Research Foundation-Dementia Grants Program  
11 372 [Available from:  
12 373 [https://www.dementiaresearchfoundation.org.au/sites/default/files/2017\\_DEMENTIA\\_GRA](https://www.dementiaresearchfoundation.org.au/sites/default/files/2017_DEMENTIA_GRA)  
13 374 [NTS\\_PROGRAM-Information\\_for\\_Applicants.pdf](https://www.dementiaresearchfoundation.org.au/sites/default/files/2017_DEMENTIA_GRA).
- 14 375 34. Australian and New Zealand College of Anaesthetists-ANZCA Research Grants  
15 376 Program  
16  
17 [Available from: [http://www.anzca.edu.au/documents/fdn-2018-project-grant-guide-incl-simulation\\_educa.pdf](http://www.anzca.edu.au/documents/fdn-2018-project-grant-guide-incl-simulation_educa.pdf).
- 18 377  
19 378 35. Australian Rotary Health-Mental Health Research Grants [Available from:  
20 379 <https://australianrotaryhealth.org.au/research/current-research-opportunities/>.
- 21 380  
22 381 36. BUPA Foundation (Australia) limited-Bupa Health Foundation  
23  
24 [Available from: <http://www.bupa.com.au/about-us/bupa-health-foundation/about>  
25 382  
26 383 37. Cure for Motor Neurone disease Foundation-Translational Research Grants  
27 384 [Available from: <https://curemnd.org.au/research/research-grants/>.
- 28 385 38. Diabetes Australia Research Trust General Grants [Available from:  
29 386 [https://static.diabetesaustralia.com.au/s/fileassets/diabetes-australia/bdd46dd3-2222-4d14-](https://static.diabetesaustralia.com.au/s/fileassets/diabetes-australia/bdd46dd3-2222-4d14-ad27-42af9e97506c.pdf)  
30 387 [ad27-42af9e97506c.pdf](https://static.diabetesaustralia.com.au/s/fileassets/diabetes-australia/bdd46dd3-2222-4d14-ad27-42af9e97506c.pdf).
- 31 388 39. Healthway (Western Australian Health Promotion Foundation)-Health Promotion  
32 389 Intervention Research Grants [Available from: [https://www.healthway.wa.gov.au/grants-](https://www.healthway.wa.gov.au/grants-programs/health-promotion-research-grants/apply-0w/)  
33 390 [programs/health-promotion-research-grants/apply-0w/](https://www.healthway.wa.gov.au/grants-programs/health-promotion-research-grants/apply-0w/).
- 34 391 40. HCF Research Foundation-Health Services Research Grants [Available from:  
35 392 <https://www.hcf.com.au/about-us/hcf-foundation/hcf-foundation-applications>.
- 36 393 41. Motor Neurone Disease Research Institute of Australia-Motor Neurone Disease  
37 394 Research Grants [Available from: [http://www.mndaust.asn.au/Documents/Research-](http://www.mndaust.asn.au/Documents/Research-documents/Grants/2017-funding-round/Application_Guidelines_GIA_final.aspx)  
38 395 [documents/Grants/2017-funding-round/Application\\_Guidelines\\_GIA\\_final.aspx](http://www.mndaust.asn.au/Documents/Research-documents/Grants/2017-funding-round/Application_Guidelines_GIA_final.aspx).
- 39 396 42. Multiple Sclerosis Research Australia-Research Grants [Available from:  
40 397 <https://msra.org.au/annual-funding-opportunities/types-of-grants/>.
- 41 398 43. National Breast Cancer Foundation-Innovator Grant [Available from:  
42 399 [http://nbcf.org.au/wp-content/uploads/2015/11/NBCF\\_2017\\_In0vator\\_Grant\\_Guidelines.pdf](http://nbcf.org.au/wp-content/uploads/2015/11/NBCF_2017_In0vator_Grant_Guidelines.pdf).
- 43 400 44. National Breast Cancer Foundation-Accelerator Research Grant [Available from:  
44 401 [http://docplayer.net/50962154-National-breast-cancer-foundation-accelerator-research-grant-](http://docplayer.net/50962154-National-breast-cancer-foundation-accelerator-research-grant-application-guidelines.html)  
45 402 [application-guidelines.html](http://docplayer.net/50962154-National-breast-cancer-foundation-accelerator-research-grant-application-guidelines.html).
- 46 403 45. National Heart Foundation of Australia-Vanguard Grants [Available from:  
47 404 [https://www.heartfoundation.org.au/images/uploads/researchers/2017\\_VG\\_Instructions\\_FIN](https://www.heartfoundation.org.au/images/uploads/researchers/2017_VG_Instructions_FIN)  
48 405 [AL.pdf](https://www.heartfoundation.org.au/images/uploads/researchers/2017_VG_Instructions_FIN).
- 49 406 46. Prostate Cancer Foundation of Australia-New Concept Grant [Available from:  
50 407 [http://www.prostate.org.au/media/784704/2017-PCFA-Guide-for-Applicants-New-Concept-](http://www.prostate.org.au/media/784704/2017-PCFA-Guide-for-Applicants-New-Concept-Grant.pdf)  
51 408 [Grant.pdf](http://www.prostate.org.au/media/784704/2017-PCFA-Guide-for-Applicants-New-Concept-Grant.pdf).
- 52 409 47. The Movember Group and Beyondblue- Australian Mental Health Initiative  
53 410 [Available from:  
54 411 <https://au.movember.com/uploads/files/2013/Programs/Movember%20Australian%20Mental>  
55 412 [%20Health%20Initiative%20RFA%20Nov%202013.pdf](https://au.movember.com/uploads/files/2013/Programs/Movember%20Australian%20Mental).

- 1  
2  
3  
4  
5  
6  
7  
8  
9  
10  
11  
12  
13  
14  
15  
16  
17  
18  
19  
20  
21  
22  
23  
24  
25  
26  
27  
28  
29  
30  
31  
32  
33  
34  
35  
36  
37  
38  
39  
40  
41  
42  
43  
44  
45  
46  
47  
48  
49  
50  
51  
52  
53  
54  
55  
56  
57  
58  
59  
60
- 413 48. Maddison S. Women get a much needed boost in research funding gender equity plan:  
414 THE CONVERSATION; 2015 [Available from: [https://theconversation.com/women-get-a-  
416 much-needed-boost-in-research-funding-gender-equity-plan-50846](https://theconversation.com/women-get-a-<br/>415 much-needed-boost-in-research-funding-gender-equity-plan-50846).  
417 49. Chalmers I, Glasziou P. Systematic reviews and research waste. Lancet.  
418 2016;387(10014):122-3.  
419 50. Andronis L. Analytic approaches for research priority-setting: issues, challenges and  
420 the way forward. Expert review of pharmacoeconomics & outcomes research.  
421 2015;15(5):745-54.  
422 51. Townsend J, Buxton M, Harper G. Prioritisation of health technology assessment. The  
423 PATHS model: methods and case studies. Health Technol Assess. 2003;7(20):iii, 1-82.  
424 52. Claxton K, Posnett J. An economic approach to clinical trial design and research  
425 priority-setting. Health Econ. 1996;5(6):513-24.  
426 53. Tuffaha HW, LG G, Scuffham P. Value of Information Analysis Informing Adoption  
427 and Research Decisions in a Portfolio of Health Care Interventions. Medical Decision  
428 Making Policy & PRactice. 2016.  
429 54. Bennette CS, Veenstra DL, Basu A, Baker LH, Ramsey SD, Carlson JJ. Development  
430 and Evaluation of an Approach to Using Value of Information Analyses for Real-Time  
431 Prioritization Decisions Within SWOG, a Large Cancer Clinical Trials Cooperative Group.  
432 Med Decis Making. 2016.  
433 55. National Health and Medical Research Council. Peer Review Consultation Paper  
434 [Available from: [https://consultations.nhmrc.gov.au/public\\_consultations/nhmrc-grant-  
program-review](https://consultations.nhmrc.gov.au/public_consultations/nhmrc-grant-<br/>program-review).



1  
2  
3  
4  
5  
6  
7  
8  
9  
10  
11  
12  
13  
14  
15  
16  
17  
18  
19  
20  
21  
22  
23  
24  
25  
26  
27  
28  
29  
30  
31  
32  
33  
34  
35  
36  
37  
38  
39  
40  
41  
42  
43  
44  
45  
46  
47  
48  
49  
50  
51  
52  
53  
54  
55  
56  
57  
58  
59  
60

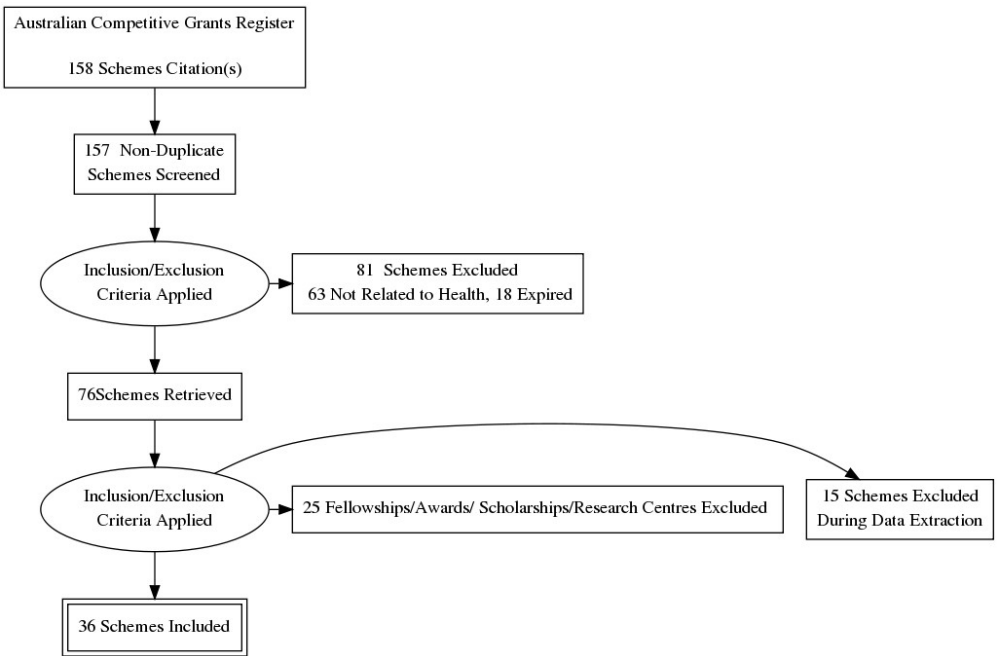

Flowchart of the review

271x179mm (96 x 96 DPI)

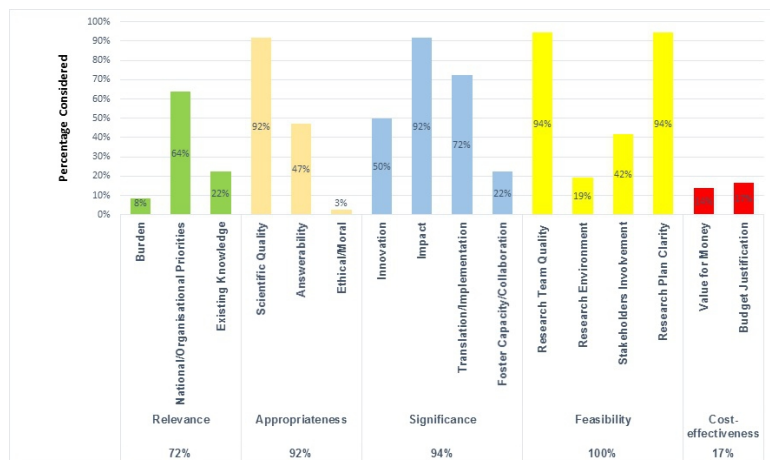

Overall research criteria and their representative domains

304x171mm (96 x 96 DPI)

# BMJ Open

## Directing research funds to the right research projects: a review of criteria used by research organisations in Australia in prioritising health research projects for funding

|                                 |                                                                                                                                                                                                                                                                                                                                                                                                                                                                                             |
|---------------------------------|---------------------------------------------------------------------------------------------------------------------------------------------------------------------------------------------------------------------------------------------------------------------------------------------------------------------------------------------------------------------------------------------------------------------------------------------------------------------------------------------|
| Journal:                        | <i>BMJ Open</i>                                                                                                                                                                                                                                                                                                                                                                                                                                                                             |
| Manuscript ID                   | bmjopen-2018-026207.R1                                                                                                                                                                                                                                                                                                                                                                                                                                                                      |
| Article Type:                   | Research                                                                                                                                                                                                                                                                                                                                                                                                                                                                                    |
| Date Submitted by the Author:   | 24-Oct-2018                                                                                                                                                                                                                                                                                                                                                                                                                                                                                 |
| Complete List of Authors:       | Tuffaha, Haitham; Griffith University Menzies Health Institute Queensland; Griffith University Centre for Applied Health Economics<br>El_Saifi, Najwan; Griffith University Menzies Health Institute Queensland; Griffith University Centre for Applied Health Economics<br>Chambers, Suzanne; Griffith University Menzies Health Institute Queensland<br>Scuffham, Paul; Griffith University, Menzies Health Institute Queensland; Griffith University Centre for Applied Health Economics |
| <b>Primary Subject Heading</b>: | Health policy                                                                                                                                                                                                                                                                                                                                                                                                                                                                               |
| Secondary Subject Heading:      | Health policy, Health economics                                                                                                                                                                                                                                                                                                                                                                                                                                                             |
| Keywords:                       | research prioritisation, selection criteria, value for money                                                                                                                                                                                                                                                                                                                                                                                                                                |
|                                 |                                                                                                                                                                                                                                                                                                                                                                                                                                                                                             |

SCHOLARONE™  
Manuscripts

1  
2  
3 1 **Directing research funds to the right research projects: a review of criteria used by research**  
4  
5 2 **organisations in Australia in prioritising health research projects for funding**  
6  
7  
8 3

9  
10  
11 4 **Haitham Tuffaha<sup>1,2\*</sup>, Najwan El-Saifi<sup>1,2</sup>, Suzanne Chambers<sup>1</sup>, Paul Scuffham<sup>1,2</sup>**  
12 5

- 13 6 1. Griffith University Menzies Health Institute Queensland, Gold Coast, Queensland  
14 7 Australia.  
15  
16 8 2. Griffith University Centre for Applied Health Economics, Nathan, Queensland,  
17 9 Australia  
18

19 10  
20  
21 11 **\*Corresponding Author contact details**  
22

23 12 Centre for Applied Health Economics, School of Medicine, Griffith University,  
24 13 Nathan, 4111, QLD, Australia.  
25

26 14 [haitham.tuffaha@griffith.edu.au](mailto:haitham.tuffaha@griffith.edu.au)  
27

28 15 Tel: + 61 7373 59104  
29

30 16 Fax: +61 7 373 59118  
31  
32  
33  
34  
35  
36  
37

38 18 **Key words: research prioritisation, selection criteria, value for money**  
39

40  
41 19 **Word count: 2500**  
42  
43  
44 20  
45  
46  
47  
48  
49  
50  
51  
52  
53  
54  
55  
56  
57  
58  
59  
60

1  
2  
3 21 **Directing research funds to the right research projects: a review of criteria used by research**  
4  
5 22 **organisations in Australia in prioritising health research projects for funding**  
6  
7

8 23 **Abstract**  
9

10  
11 24 **Objectives**  
12

13  
14 25 Healthcare budgets are limited, and therefore, research funds should be wisely allocated to  
15  
16 26 ensure high quality, useful and cost-effective research. We aimed to critically review the  
17  
18 27 criteria considered by major Australian organisations in prioritising and selecting health  
19  
20 28 research projects for funding.  
21  
22

23  
24 29 **Methods**  
25

26  
27 30 We reviewed all grant schemes listed on the Australian Competitive Grants Register that were  
28  
29 31 health-related, active in 2017 and with publicly available selection criteria on the funders'  
30  
31 32 websites. Data extracted included scheme name, funding organisation, selection criteria and  
32  
33 33 the relative weight assigned to each criterion. Selection criteria were grouped into five  
34  
35 34 representative domains: relevance, appropriateness, significance, feasibility (including team  
36  
37 35 quality) and cost-effectiveness (i.e., value for money).  
38  
39  
40

41 36 **Results**  
42

43  
44 37 Thirty-six schemes were included from 158 identified. One half of the schemes were under the  
45  
46 38 National Health and Medical Research Council. The most commonly used criteria were  
47  
48 39 research team quality and capability (94%), research plan clarity (94%), scientific quality  
49  
50 40 (92%) and research impact (92%). Criteria considered less commonly were existing knowledge  
51  
52 41 (22%), fostering collaboration (22%), research environment (19%), value for money (14%),  
53  
54 42 disease burden (8%) and ethical/moral considerations (3%). In terms of representative domains,  
55  
56 43 relevance was considered in 72% of the schemes, appropriateness in 92%, significance in 94%,  
57  
58  
59  
60

1  
2  
3 44 feasibility in 100%, and cost-effectiveness in 17%. The relative weights for the selection  
4  
5 45 criteria varied across schemes with 5-30% for relevance, 20-60% for each appropriateness and  
6  
7 46 significance, 20-75% for feasibility and 15-33% for cost-effectiveness.  
8  
9

## 10 47 **Conclusions**

11  
12  
13 48 In selecting research projects for funding, Australian research organisations focus largely on  
14  
15 49 research appropriateness, significance and feasibility; however, value for money is most often  
16  
17 50 overlooked. Research funding decisions should include an assessment of value for money in  
18  
19 51 order to maximise return on research investment.  
20  
21  
22

23  
24 52

## 25 53 **Strengths and limitations**

- 26  
27  
28  
29 54 1. The first critical review of research project selection criteria from a funder perspective  
30  
31 55 in Australia.  
32  
33 56 2. A comprehensive review of available funding schemes, selection criteria and scoring  
34  
35 57 weights to prioritise research proposals.  
36  
37 58 3. The recommendations provided will help research organisation streamline funding to  
38  
39 59 worthy projects to maximise return on research investment.  
40  
41 60 4. The review takes an Australian perspective, but the findings and recommendations  
42  
43 61 maybe applicable to other jurisdictions  
44  
45  
46  
47

48  
49 62  
50  
51  
52  
53  
54  
55  
56  
57  
58  
59  
60

## 63 INTRODUCTION

64  
65 Research is vital to generate evidence to guide medical decision making and improve  
66 health. Therefore, the Australian Government and various research organisations allocate  
67 considerable resources to fund clinical trials and other health research. The total expenditure  
68 on health research in Australia was around \$5.4 billion dollar in 2014.[1] Recently, the  
69 Australian Government has announced the establishment of the \$20 billion Medical Research  
70 Future Fund which aims to improve health, contribute to a sustainable health system, and  
71 provide significant economic benefits.[2] There has been an emerging interest in Australia and  
72 internationally to maximise value and reduce waste in healthcare research.[3-5] Although  
73 research value should be ensured throughout the continuum (i.e., from research question  
74 development to implementation of the findings), directing research funds to the right research  
75 projects in the first place is key to optimise health and economic benefits from healthcare  
76 research. This is typically achieved at two levels, 1) selecting strategic research areas or topics  
77 (e.g., indigenous health or cancer) to guide overall research activity and commissioning, and  
78 2) selecting specific research projects for funding from proposals put forward by researchers.[6,  
79 7]

80 Most research projects in Australia are investigator-initiated and researchers must seek  
81 financial support for their proposals through research funding organisations (e.g., the National  
82 Health and Medical Research Council (NHMRC)). However, the overall funds available for  
83 research are limited compared to the number of submissions and decisions have to be made  
84 about the best way to distribute research funds. Thus, funding organisations need to have a  
85 transparent and systematic way to evaluate and prioritise research projects for funding.[5, 8, 9]  
86 This is often done based on the assessments of the merits of the submitted proposals according  
87 to the judgments of experts sitting on funding panels.[8, 10] In this process, submitted

1  
2  
3 88 proposals are assessed and scored against predefined criteria with each criterion, or group of  
4  
5 89 criteria, being assigned a weight reflecting its relative importance. Such practice corroborates  
6  
7  
8 90 with the recommendations of many international initiatives for setting research priorities where  
9  
10 91 the use of explicit and comprehensive criteria is encouraged to ensure that important  
11  
12 92 considerations are not overlooked during the selection process.[9, 11-14] In general, these  
13  
14 93 criteria may include burden of the disease, equity, scientific rigor, research team capabilities,  
15  
16  
17 94 innovation and impact of research results. The choice of criteria and the scoring system may  
18  
19 95 differ, depending on the needs of stakeholders involved in this exercise.[9, 11-14] Literature  
20  
21 96 examples on prioritising research topics using explicit criteria are abundant; [9, 11-14]  
22  
23  
24 97 however, there is a dearth of articles that provide a clear critical insight on the criteria used to  
25  
26 98 select research projects from research proposals competing for funding.[15]  
27  
28  
29 99

30  
31 100 Whilst health research funding decisions in Australia rely heavily on the ability of  
32  
33 101 research proposals to meet selection criteria, it is unknown what criteria are more commonly  
34  
35 102 used by research funders, how these criteria and their weights vary across funding  
36  
37 103 organisations, and whether these criteria are comprehensive enough to capture all important  
38  
39 104 considerations to ensure high quality and value for money research. This knowledge is  
40  
41 105 important to assess the current approach of selecting and funding research projects, and to guide  
42  
43 106 future efforts to optimise health research funding mechanisms in the country. Therefore, the  
44  
45 107 aim of this paper was to critically review the criteria considered by major Australian research  
46  
47 108 organisations in their selection of health research projects for funding.  
48  
49  
50

51 109

## 53 110 **METHODS**

### 55 111 *Patient and Public Involvement*

56  
57 112 Patients and public were not involved  
58  
59  
60



1  
2  
3 113 We reviewed all research funding schemes listed on the Australian Competitive Grants  
4  
5 114 Register (ACGR), which provides a comprehensive list of funding schemes that have been  
6  
7  
8 115 approved by the Australian Government as being competitive research grants.[16] The  
9  
10 116 identified schemes were included if they were health related, active in 2017, and had clear  
11  
12 117 selection criteria which were publicly available on the funders' websites. Health research refers  
13  
14 118 to research with human health or medical purpose, including research on the aetiology,  
15  
16 119 diagnosis or management of disease, mental condition or behaviour in human. To focus on  
17  
18 120 schemes for funding research projects and programs, research schemes dedicated solely to  
19  
20 121 training, capacity building, equipment or infrastructure were excluded. These include  
21  
22 122 fellowships, awards and scholarships as well as research and training centres.  
23  
24  
25  
26

27 123 Data extracted included scheme name, year first implemented, funding organisation,  
28  
29 124 selection criteria and the relative weight assigned to each criterion. Selection criteria were  
30  
31 125 grouped into five representative domains: relevance (i.e., why should we do it?, including the  
32  
33 126 burden of disease and level of existing knowledge), appropriateness (i.e., should we do it?,  
34  
35 127 including scientific rigour and suitability to answer the research question), significance of  
36  
37 128 research outcomes (i.e., what will we get out of it?, including impact and innovation),  
38  
39 129 feasibility (i.e., can we do it?, including team quality and research environment), and cost-  
40  
41 130 effectiveness (i.e., is the proposed research potentially good value for money?).[9, 12] The  
42  
43 131 domains were selected based on the lists of criteria and categories suggested in comprehensive  
44  
45 132 tools for research prioritisation including the Essential National Health Research Approach  
46  
47 133 (relevance, appropriateness, feasibility and significance),[12] Child Health and Nutrition  
48  
49 134 Research Initiative (answerability, effectiveness, deliverability, and impact),[11] and the  
50  
51 135 Checklist for Health Research Priority Setting (benefits, feasibility, and cost-effectiveness).[9]  
52  
53 136 Disagreements related to assigning criteria to their representative domains were either resolved  
54  
55 137 by discussion or the involvement of a third reviewer who was provided with the full assessment  
56  
57  
58  
59  
60

138 or selection criteria for consensus decision-making. A domain was counted under a given  
 139 scheme if at least one criterion within that domain is reported in the selection criteria of that  
 140 scheme. Table 1 provides a description of the representative domains.

141 **Table 1: Description of domains and relevant criteria**[9, 12]

| Domain                    | Definition                                                                                                                                                                                                                                                                                                      |
|---------------------------|-----------------------------------------------------------------------------------------------------------------------------------------------------------------------------------------------------------------------------------------------------------------------------------------------------------------|
| <b>Relevance</b>          | The key question for this domain is “why should we do it?” The proposed research is pertinent to the health problems of interest. It takes into consideration burden of disease, equity, alignment with national/organisational objectives and the level of existing knowledge in relation to the intervention. |
| <b>Appropriateness</b>    | The key question for this domain is “should we do it?” The proposed research is well suited to answer the decision problem (i.e., answerability). It takes into consideration ethical, moral and legal acceptability, and scientific rigor.                                                                     |
| <b>Significance</b>       | The key question for this domain is “what will we get out of it?” It represents the benefit of implementing/translating the research results. It takes into consideration the impact on health, innovation, and ability to foster capacity building and collaboration.                                          |
| <b>Feasibility</b>        | The key question for this domain is “can we do it?” The focus is on the chances of research success. It considers team quality (track record) and capability, research environment, and the research plan.                                                                                                      |
| <b>Cost-effectiveness</b> | The key question for this domain is “is the research cost-effective?” This theme focuses on the value for money of the research proposal and budget justification. It considers the costs and expected benefits of conducting research.                                                                         |

142

## 143 RESULTS

144

145 Thirty-six schemes met our inclusion criteria from 158 schemes listed on the 2017  
 146 ACGR. Figure 1 summarises the review process.

147

### Fig1: Flowchart of the review

148 One half of the schemes were under the NHMRC. Five schemes (14%) were  
 149 specifically for research in cancer, four (11%) for dementia, four (11%) for mental health, and  
 150 three (8%) for diabetes. A summary of the selection criteria considered by each scheme is  
 151 presented in Table 2. Further details on the selection criteria and scoring weights are provided  
 152 in supplementary file.

**Table2: Selection criteria domains for schemes and funding organisations**

| Organisation and Scheme Name                                                                            | Relevance |                                    |                    | Appropriateness    |               |               | Significance |        |                            |                        | Feasibility           |             |                       |               | Cost-effectiveness   |                 |
|---------------------------------------------------------------------------------------------------------|-----------|------------------------------------|--------------------|--------------------|---------------|---------------|--------------|--------|----------------------------|------------------------|-----------------------|-------------|-----------------------|---------------|----------------------|-----------------|
|                                                                                                         | Burden    | National/Organisational Priorities | Existing Knowledge | Scientific Quality | Answerability | Ethical/Moral | Innovation   | Impact | Translation/Implementation | Capacity/Collaboration | Research Team Quality | Environment | Stakeholders Involved | Research Plan | Budget Justification | Value for Money |
| <b>NHMRC</b>                                                                                            |           |                                    |                    |                    |               |               |              |        |                            |                        |                       |             |                       |               |                      |                 |
| Boosting Dementia Research Grants[17]                                                                   | -         | ✓                                  | -                  | ✓                  | -             | -             | ✓            | ✓      | ✓                          | -                      | ✓                     | -           | ✓                     | ✓             | ✓                    | ✓               |
| Dementia Research Team Grants[18]                                                                       | -         | ✓                                  | ✓                  | ✓                  | ✓             | -             | ✓            | ✓      | ✓                          | ✓                      | ✓                     | -           | ✓                     | ✓             | -                    | -               |
| Development Grants[19]                                                                                  | ✓         | ✓                                  | -                  | ✓                  | -             | -             | ✓            | ✓      | ✓                          | -                      | ✓                     | ✓           | -                     | ✓             | -                    | -               |
| Global Alliance for Chronic Diseases- Chronic Lung Disease[20]                                          | -         | ✓                                  | ✓                  | ✓                  | ✓             | -             | ✓            | ✓      | ✓                          | -                      | ✓                     | -           | ✓                     | ✓             | -                    | -               |
| Global Alliance for Chronic Diseases- Mental Disorders[20]                                              | -         | ✓                                  | ✓                  | ✓                  | ✓             | ✓             | ✓            | ✓      | ✓                          | -                      | ✓                     | -           | ✓                     | ✓             | -                    | -               |
| Global Alliance for Chronic Diseases-Type 2 Diabetes Countries[20]                                      | -         | ✓                                  | ✓                  | ✓                  | ✓             | -             | ✓            | ✓      | ✓                          | -                      | ✓                     | -           | ✓                     | ✓             | -                    | -               |
| National Institute for Dementia Research Grants[21]                                                     | -         | ✓                                  | -                  | ✓                  | ✓             | -             | ✓            | ✓      | ✓                          | -                      | ✓                     | ✓           | ✓                     | ✓             | ✓                    | ✓               |
| NHMRC/NSFC - Prediction and Treatment of Type 2 Diabetes [22]                                           | -         | ✓                                  | -                  | ✓                  | ✓             | -             | -            | ✓      | ✓                          | ✓                      | ✓                     | ✓           | -                     | ✓             | -                    | -               |
| Northern Australia Tropical Disease Collaborative Research Programme[23]                                | -         | -                                  | -                  | ✓                  | ✓             | -             | ✓            | ✓      | ✓                          | ✓                      | ✓                     | -           | ✓                     | ✓             | -                    | -               |
| Partnership Projects[24]                                                                                | -         | -                                  | -                  | ✓                  | ✓             | -             | ✓            | ✓      | ✓                          | -                      | ✓                     | -           | -                     | ✓             | -                    | -               |
| Program Grants[25]                                                                                      | ✓         | -                                  | -                  | ✓                  | -             | -             | ✓            | ✓      | ✓                          | ✓                      | ✓                     | ✓           | -                     | ✓             | -                    | -               |
| Project Grants[26]                                                                                      | -         | -                                  | -                  | ✓                  | -             | -             | ✓            | ✓      | ✓                          | -                      | ✓                     | -           | -                     | ✓             | -                    | -               |
| Targeted Call - Engaging Young Adults to Improve Eating Behaviours and Health Outcomes[27]              | -         | ✓                                  | -                  | ✓                  | ✓             | -             | -            | ✓      | ✓                          | -                      | ✓                     | -           | ✓                     | ✓             | -                    | -               |
| Targeted Call – Mental Health : Suicide Prevention in Aboriginal and Torres Strait Islander Youth[28]   | -         | -                                  | -                  | ✓                  | ✓             | -             | -            | ✓      | ✓                          | -                      | ✓                     | -           | ✓                     | ✓             | -                    | -               |
| Targeted Call- Foetal Alcohol Spectrum Disorder among Aboriginal and Torres Strait Islander Peoples[29] | -         | -                                  | ✓                  | ✓                  | ✓             | -             | -            | ✓      | -                          | -                      | ✓                     | -           | ✓                     | ✓             | -                    | -               |
| Targeted Call- Preparing Australia for the Genomics Revolution[30]                                      | -         | ✓                                  | -                  | ✓                  | ✓             | -             | -            | ✓      | ✓                          | -                      | ✓                     | -           | ✓                     | ✓             | -                    | -               |
| Targeted Call-Wind Farms and Human Health[31]                                                           | -         | ✓                                  | -                  | ✓                  | ✓             | -             | -            | ✓      | ✓                          | -                      | ✓                     | -           | ✓                     | ✓             | -                    | -               |
| Translational Research Projects for Improved Health Care[32]                                            | -         | ✓                                  | -                  | -                  | -             | -             | -            | ✓      | -                          | -                      | ✓                     | -           | -                     | ✓             | -                    | ✓               |
| <b>Cancer Australia</b>                                                                                 |           |                                    |                    |                    |               |               |              |        |                            |                        |                       |             |                       |               |                      |                 |

|    |                                                                          |   |   |   |   |   |   |   |   |   |   |   |   |   |   |   |   |
|----|--------------------------------------------------------------------------|---|---|---|---|---|---|---|---|---|---|---|---|---|---|---|---|
| 1  | Priority-Driven Collaborative Cancer Scheme[33]                          | - | ✓ | - | - | - | - | - | ✓ | ✓ | ✓ | ✓ | - | ✓ | - | - | - |
| 2  | Support for Cancer Clinical Trials Program-Existing National Cooperative | - | - | - | ✓ | - | - | - | - | ✓ | ✓ | - | - | - | - | ✓ | ✓ |
| 3  | Oncology Groups[34]                                                      | - | - | - | ✓ | - | - | - | - | ✓ | ✓ | - | - | - | - | ✓ | ✓ |
| 4  | <b>National Breast Cancer Foundation</b>                                 |   |   |   |   |   |   |   |   |   |   |   |   |   |   |   |   |
| 5  | Accelerator Research Grant[35]                                           | - | ✓ | - | ✓ | - | - | - | ✓ | ✓ | - | ✓ | - | - | ✓ | - | - |
| 6  | Innovator Grant[36]                                                      | - | ✓ | - | ✓ | - | - | ✓ | ✓ | - | - | ✓ | - | - | ✓ | - | - |
| 7  | <b>Department of Foreign Affairs and Trade</b>                           |   |   |   |   |   |   |   |   |   |   |   |   |   |   |   |   |
| 8  | Tropical Disease Research Regional Collaboration Initiative[37]          | - | ✓ | - | ✓ | ✓ | - | - | ✓ | ✓ | ✓ | ✓ | - | - | ✓ | ✓ | ✓ |
| 9  | <b>Alzheimer's Australia Dementia Research Foundation</b>                |   |   |   |   |   |   |   |   |   |   |   |   |   |   |   |   |
| 10 | Dementia Grants Program[38]                                              | - | - | - | ✓ | ✓ | - | ✓ | ✓ | - | - | ✓ | - | - | ✓ | - | - |
| 11 | <b>Australian and New Zealand College of Anaesthetists</b>               |   |   |   |   |   |   |   |   |   |   |   |   |   |   |   |   |
| 12 | ANZCA Research Grants Program[39]                                        | - | - | - | ✓ | - | - | - | - | - | - | ✓ | - | - | ✓ | - | - |
| 13 | <b>Australian Rotary Health</b>                                          |   |   |   |   |   |   |   |   |   |   |   |   |   |   |   |   |
| 14 | Mental Health Research Grants[40]                                        | - | - | - | ✓ | - | - | ✓ | ✓ | - | - | ✓ | - | - | ✓ | - | - |
| 15 | <b>Bupa Foundation</b>                                                   |   |   |   |   |   |   |   |   |   |   |   |   |   |   |   |   |
| 16 | Bupa Health Foundation[41]                                               | - | - | - | - | - | - | - | ✓ | - | - | ✓ | - | - | ✓ | - | - |
| 17 | <b>Cure for MND Foundation</b>                                           |   |   |   |   |   |   |   |   |   |   |   |   |   |   |   |   |
| 18 | Translational Research Grants[42]                                        | - | - | - | ✓ | - | - | - | ✓ | ✓ | - | ✓ | ✓ | - | ✓ | - | - |
| 19 | <b>Diabetes Australia Research Trust</b>                                 |   |   |   |   |   |   |   |   |   |   |   |   |   |   |   |   |
| 20 | General Grants[43]                                                       | - | - | ✓ | ✓ | - | - | ✓ | ✓ | ✓ | - | ✓ | - | - | ✓ | - | - |
| 21 | <b>Healthway (Western Australian Health Promotion Foundation)</b>        |   |   |   |   |   |   |   |   |   |   |   |   |   |   |   |   |
| 22 | Health Promotion Intervention Research Grants[44]                        | - | ✓ | ✓ | ✓ | - | - | - | ✓ | ✓ | ✓ | ✓ | - | ✓ | ✓ | ✓ | ✓ |
| 23 | <b>HCF Research Foundation</b>                                           |   |   |   |   |   |   |   |   |   |   |   |   |   |   |   |   |
| 24 | Health Services Research Grants[45]                                      | ✓ | ✓ | ✓ | ✓ | - | - | - | ✓ | ✓ | - | - | - | - | ✓ | - | - |
| 25 | <b>Motor Neurone Disease Research Institute of Australia</b>             |   |   |   |   |   |   |   |   |   |   |   |   |   |   |   |   |
| 26 | Motor Neurone Disease Research Grants[46]                                | - | ✓ | - | ✓ | - | - | - | - | - | - | ✓ | - | - | - | - | - |
| 27 | <b>Multiple Sclerosis Research Australia</b>                             |   |   |   |   |   |   |   |   |   |   |   |   |   |   |   |   |
| 28 | Research Grants[47]                                                      | - | ✓ | - | ✓ | ✓ | - | ✓ | ✓ | - | - | ✓ | - | - | ✓ | - | - |
| 29 | <b>National Heart Foundation of Australia</b>                            |   |   |   |   |   |   |   |   |   |   |   |   |   |   |   |   |
| 30 | Vanguard Grants[48]                                                      | - | ✓ | - | ✓ | - | - | - | ✓ | ✓ | - | ✓ | ✓ | - | ✓ | - | - |
| 31 | <b>Prostate Cancer Foundation of Australia</b>                           |   |   |   |   |   |   |   |   |   |   |   |   |   |   |   |   |
| 32 | New Concept Grant[49]                                                    | - | - | - | ✓ | - | - | ✓ | ✓ | - | - | ✓ | ✓ | - | ✓ | - | - |
| 33 | <b>The Movember Group and beyondblue</b>                                 |   |   |   |   |   |   |   |   |   |   |   |   |   |   |   |   |
| 34 | Australian Mental Health Initiative[50]                                  | - | ✓ | - | ✓ | ✓ | - | ✓ | ✓ | ✓ | - | ✓ | - | ✓ | ✓ | - | - |

NHMRC: National Health and Medical Research Council, NSFC: National Natural Science Foundation of China, ANZCA: Australian and New Zealand College of Anaesthetists, MND: Motor Neurone Disease, HCF: The Hospitals Contribution Fund of Australia.

1  
2 156 The most commonly used criteria were research team quality and capability (94%), research  
3  
4 157 plan clarity (94%), scientific quality of the proposal (92%) and research impact (92%). Criteria  
5  
6 158 considered less commonly were existing knowledge (22%), fostering collaboration (22%), research  
7  
8 159 environment (19%), budget justification (17%), value for money (14%), disease burden (8%) and  
9  
10  
11 160 ethical/moral considerations (3%). When selection criteria were grouped into relevant domains, all  
12  
13 161 schemes considered feasibility criteria, 94% of the schemes considered significance, 92% considered  
14  
15 162 appropriateness, 72% considered relevance, and only 17% considered cost-effectiveness. Only five  
16  
17  
18 163 schemes (14%) considered all five domains; namely, NHMRC National Institute for Dementia  
19  
20 164 Research Grants, NHMRC Boosting Dementia Research Grants, Cancer Australia Clinical Trials  
21  
22 165 Program, and the Department of Foreign Affairs and Trade Tropical Disease Research, and Health  
23  
24  
25 166 Promotion Intervention Research Grants. Figure 2 depicts the distribution of selection criteria.

26  
27  
28 167 **Fig2: Overall research criteria and their representative domains**

29  
30  
31 168 When reported, the relative weights for the selection criteria also varied across schemes with  
32  
33 169 20-75% for feasibility, 20-60% for each appropriateness and significance, 15-33% for value for  
34  
35 170 money and 5-30% for relevance criteria.

36  
37  
38 171 **DISCUSSION**

39  
40 172  
41  
42 173 Using a predefined set of selection criteria is a transparent approach to select and prioritise  
43  
44 174 high quality research projects for funding. Typically, the relevance of research proposals is gauged  
45  
46 175 with criteria that are mostly related to the project's ability to advance knowledge;[7] however, these  
47  
48  
49 176 criteria should also reflect the mandate of the funding organisation and the purpose of the funding  
50  
51 177 scheme.[9, 12] A broad range of criteria were reported in the included schemes with a clear focus on  
52  
53 178 the quality of the research team, research plan, scientific rigor, impact, and  
54  
55  
56 179 translation/implementation potential. The identified schemes, within the same organisation and across  
57  
58 180 organisations, had variable selection criteria and scoring weights. When grouped into representative  
59  
60 181 domains, funding organisations in Australia appear to focus on research relevance, appropriateness,

1  
2 182 significance, and feasibility; however, cost-effectiveness of research projects was largely overlooked.  
3  
4 183 The observed variation in criteria and scoring weights in our review may be justified by the different  
5  
6 184 emphasis placed on certain aspects to achieve the outcomes sought under each scheme. For instance,  
7  
8  
9 185 collaborative and partnership schemes focused on partnership strengths, collaborative gains, and team  
10  
11 186 integration.

12  
13  
14 187 The only aspect that was considered by all schemes was research feasibility with a clear  
15  
16 188 emphasis on the quality of the research team. Team quality and capability (often based on past  
17  
18 189 performance) is vital to ensure that the funded research projects can be effectively conducted within  
19  
20  
21 190 the time and budget specified; nevertheless, over relying on this criterion may result in giving  
22  
23 191 disproportionate share of funding to established teams at the expense of more novel and innovative  
24  
25 192 projects. This bias can be reduced by introducing initiatives that fund innovative research ideas with  
26  
27  
28 193 high impact potential such as the ‘Grand Challenges’ initiative and the NMRC ‘Ideas Grants’.[5, 6]  
29  
30 194 Notably, there are important criteria that were not considered by most of the included schemes. Equity  
31  
32 195 considerations were not explicitly mentioned as a selection criterion, and ethical/moral considerations  
33  
34 196 were only considered in one scheme. This might be explained by the implicit assumptions that all  
35  
36  
37 197 submitted proposals will be approved by ethics committees and that equity is addressed by targeted  
38  
39 198 research grants (e.g., Research in Aboriginal and Torres Strait Islanders) or considered during final  
40  
41 199 deliberations to select proposals for funding. However, without clarity about where the responsibility  
42  
43  
44 200 for ethical and equity considerations lies there is the potential for these criteria to be overlooked.

45  
46  
47 201 There has been a shift away from exclusive technical merit-review of proposals towards  
48  
49 202 relevance of research funding as judged by multiple stakeholders.[7, 51, 52] Research organisations,  
50  
51 203 particularly if publically funded, are increasingly expected to make the best use of taxpayers’ money  
52  
53 204 to increase value and reduce waste when research priorities are set.[53, 54] For example, Chalmers  
54  
55  
56 205 *et al.* recommended to engage potential users of research in research prioritisation, justify additional  
57  
58 206 research by systematic reviews to show what is already known, and to periodically monitor and  
59  
60 207 analyse impact of funded research.[4, 5, 55] Around 40% of the schemes in our study considered

1  
2 208 stakeholders' involvement (i.e., consumers and/or clinicians); however, the level of stakeholders'  
3  
4 209 engagement and influence on funding decisions was unclear. Considering the needs and inputs of  
5  
6 210 various stakeholders such as patients, caregivers, clinicians and decision makers is essential to fund  
7  
8 211 research that is useful to solve real-life problems. The experience of the Patient-Centered Outcomes  
9  
10  
11 212 Research Institute (PCORI) in the US suggested that involving patients and stakeholders alongside  
12  
13 213 scientists in reviewing research applications is influential in panel discussions and merit review  
14  
15 214 outcomes.[52, 56] Despite its importance to avoid research duplication, only 22% of the identified  
16  
17  
18 215 schemes considered existing knowledge, but none of the schemes explicitly required a systematic  
19  
20 216 review of literature to demonstrate knowledge gaps. Although conducting systematic reviews to  
21  
22 217 identify knowledge gaps may not be required when responding to targeted research calls or when  
23  
24  
25 218 research is commissioned, since evidence review is often conducted by the commissioning  
26  
27 219 organisations, showing what is already known should be required by researchers submitting  
28  
29 220 investigator-initiated proposals. Our results echo the findings of a review of the extent to which 11  
30  
31 221 international organisations.[3] In that review, only one organisation required reference to relevant  
32  
33  
34 222 systematic reviews in all funding applications and four funders required systematic reviews for  
35  
36 223 funding clinical trials.[3]

37  
38  
39 224 Another important value aspect is the impact of funded research. Research impact broadly  
40  
41 225 refers to generated benefits in terms of knowledge production, informing policy, capacity-building,  
42  
43 226 health benefits, and broader social and economic benefits.[53, 57] The presence of multidimensional  
44  
45  
46 227 benefits reflects how the definition of impact varies with the perspectives of different stakeholders as  
47  
48 228 patients, clinicians, government, industry and academia.[53, 57, 58] The majority of the schemes in  
49  
50  
51 229 our review considered research impact as a funding criterion with elements including advancing  
52  
53 230 knowledge, improving health outcomes and scientific publications; however, the schemes did not  
54  
55 231 specify how these benefits should be measured and presented in funding proposals. Greenhalgh and  
56  
57  
58 232 colleagues have reviewed established approaches to measure impact (e.g., Research Impact  
59  
60 233 Framework, Canadian Academy of Health Sciences, and UK Research Excellence Framework).[53]

1  
2 234 They have concluded that approaches to impact assessment differed according to the circumstances  
3  
4 235 and purpose of funding, they also noted that the most robust approaches are complex and labour-  
5  
6 236 intensive and called for research on research impact.[53] Of note, most of these approaches were  
7  
8 237 designed to measure research impact retrospectively, that is to evaluate the benefits of particular  
9  
10  
11 238 research programs that have already been conducted; notwithstanding, funding organisations and  
12  
13 239 researchers need prospective approaches to infer the benefit of new research to support research  
14  
15 240 funding decisions. Incorporating impact evaluation frameworks into the priority-setting processes is  
16  
17  
18 241 a necessary requirement that should be studied.[7]

19  
20  
21 242           Importantly, funding organisations may implicitly assume that selecting high impact projects  
22  
23 243 would ensure value for money; nevertheless, value for money cannot be established without explicitly  
24  
25 244 comparing the costs and expected benefits of proposals competing for funding.[6, 59, 60] This is  
26  
27  
28 245 because research budgets are finite and decisions must be made about how to allocate these funds  
29  
30 246 (i.e., which research proposals should be funded) to maximise benefits. Failure to consider this aspect  
31  
32 247 brings the risk of funding research projects where the costs of conducting research outweigh the  
33  
34 248 expected research benefits (i.e., research projects that are not cost-effective). This would result in  
35  
36  
37 249 ‘opportunity cost’, which is the benefit forgone elsewhere by adopting suboptimal choices.[61]  
38  
39 250 Interestingly, none of the schemes that required demonstration of value for money provided  
40  
41 251 guidelines on how the cost-effectiveness of research projects should be performed and presented. Of  
42  
43  
44 252 note, there are rigorous analytical methods to prospectively quantify the expected benefits of research  
45  
46 253 on improving health outcomes, the key analytical approaches are the ‘prospective payback of  
47  
48 254 research’ (a similar approach to return on investment) and the value of information approach.[6, 8]  
49  
50  
51 255 Under the payback approach, the value of a research study is typically inferred from its ability to  
52  
53 256 result in a beneficial change in clinical practice.[62] The value of information approach, on the other  
54  
55 257 hand, considers the uncertainty in the relevant available evidence (e.g., from systematic reviews and  
56  
57  
58 258 meta-analyses) and the consequences of this uncertainty (e.g., implementing a suboptimal  
59  
60 259 intervention).[59, 63] Research benefits calculated by these approaches are scaled up by considering



1  
2 260 the population expected to benefit from research results over time, and these benefits are compared  
3  
4 261 with research budget to inform cost-effectiveness.[60, 64] It should be acknowledged; however, that  
5  
6 262 assigning monetary value to research benefits and conducting economic evaluation of research  
7  
8 263 proposals may not be acceptable or feasible (e.g., due to capacity considerations) by some  
9  
10  
11 264 jurisdictions. Therefore, the decision making context and the availability of resources to conduct such  
12  
13 265 analyses should be carefully considered before incorporating these approaches into priority-setting  
14  
15 266 processes. Furthermore, it should be emphasized that the cost-effectiveness criterion should not be  
16  
17  
18 267 the only consideration when making research funding decisions. It is recommended that cost-  
19  
20 268 effectiveness be used to supplement (i.e., in combination with) other considerations that deemed  
21  
22 269 important to the stakeholders.[8, 57]

24  
25 270 A limitation to our work is that we only reviewed active grant schemes listed on the ACGR;  
26  
27  
28 271 and therefore, some grant schemes may not have been included in our review; however, the ACGR  
29  
30 272 is a comprehensive registry of major research grants by leading funding organisations in Australia.  
31  
32 273 Additionally, it is noted that selection criteria, and schemes, change over time to meet political and  
33  
34 274 administrative objectives. For example, the NHMRC is revising grant schemes as well as the selection  
35  
36  
37 275 criteria and processes for a new series of grants to commence funding in 2019.[65] In addition, our  
38  
39 276 review was limited by the amount of publicly available information for each scheme, and thus, we  
40  
41 277 could not extract some important elements as scheme budgets and the knowledge generation and  
42  
43  
44 278 translation frameworks adopted by various funding organisations. The next step for this research  
45  
46 279 would be to engage with funding organisations to gain further insights on their approaches to prioritise  
47  
48 280 research proposals for funding.

49  
50  
51 281 In conclusion, health care research is vital to improve health; however, there is a need to  
52  
53  
54 282 ensure that funded research is relevant and value for money. In selecting research projects for funding,  
55  
56 283 Australian research funding organisations focus on research appropriateness, significance and  
57  
58 284 feasibility; nevertheless, other important criteria should not be overlooked such as equity and  
59  
60

1  
2 285 stakeholders' engagement. Importantly, research funding decisions should include an assessment of  
3  
4 286 value for money in order to maximise return on research investment.  
5  
6

## 7 287 **ACKNOWLEDGMENTS**

8  
9 288 The authors acknowledge Menzies Health Institute Queensland, Cancer Council Queensland and  
10  
11 289 the Prostate Cancer Foundation of Australia for funding this project. The authors thank Professor  
12  
13 290 Joanne Aitken for her contribution to this manuscript.  
14  
15

## 16 291 **COMPETING INTERESTS**

17  
18  
19 292 The authors have no competing interests.  
20  
21

## 22 293 **FUNDING**

23  
24  
25 294 Haitham Tuffaha is supported by an Australian National Health and Medical Research Council  
26  
27 295 (NHMRC) fellowship (GNT1121232). This project is funded by Menzies Health Institute  
28  
29  
30 296 Queensland and the Prostate Cancer Foundation of Australia.  
31  
32

## 33 297 **CONTRIBUTORSHIP STATEMENT**

34  
35  
36 298 Haitham Tuffaha and Paul Scuffham conceptualised the manuscript. Haitham Tuffaha and  
37  
38 299 Najwan El-Saifi conducted the review of funding criteria and drafted the manuscript. Paul  
39  
40 300 Scuffham and Suzanne Chambers critically reviewed the findings. All authors contributed to the  
41  
42 301 writing, review and approval of the final version of the manuscript.  
43  
44

## 45 302 **DATA SHARING STATEMENT**

46  
47  
48 303 No Additional Data  
49  
50

## 51 304 **REFERENCES**

- 52  
53 305 1. The Australian Institute of Health and Welfare. Health expenditure Australia 2015–16 [Available  
54 306 from: <https://www.aihw.gov.au/getmedia/3a34cf2c-c715-43a8-be44-0cf53349fd9d/20592.pdf.aspx?inline=true>.  
55 307  
56 308 2. The Australian Government. DoH. Medical Research Future Fund. [Available from:  
57 309 <https://beta.health.gov.au/initiatives-and-programs/medical-research-future-fund/about-the-mrff>.  
58  
59 310 3. Nasser M, Clarke M, Chalmers I, Brurberg KG, Nykvist H, Lund H, et al. What are funders doing to  
60 311 minimise waste in research? *Lancet*. 2017;389(10073):1006-7.

- 1  
2 312 4. Moher D, Glasziou P, Chalmers I, Nasser M, Bossuyt PM, Korevaar DA, et al. Increasing value and  
3 313 reducing waste in biomedical research: who's listening? *Lancet*. 2016;387(10027):1573-86.
- 4 314 5. Chalmers I, Bracken MB, Djulbegovic B, Garattini S, Grant J, Gülmezoglu AM, et al. How to increase  
5 315 value and reduce waste when research priorities are set. *The Lancet*. 383(9912):156-65.
- 6 316 6. Andronis L. Analytic approaches for research priority-setting: issues, challenges and the way forward.  
7 317 *Expert review of pharmacoeconomics & outcomes research*. 2015;15(5):745-54.
- 8 318 7. Cartier Y, Creatore MI, Hoffman SJ, Potvin L. Priority-setting in public health research funding  
9 319 organisations: an exploratory qualitative study among five high-profile funders. *Health Research Policy and  
10 320 Systems*. 2018;16(1):53.
- 11 321 8. Tuffaha HW, Andronis L, Scuffham PA. Setting Medical Research Future Fund priorities: assessing the  
12 322 value of research. *The Medical journal of Australia*. 2017;206(2):63-5.
- 13 323 9. Viergever RF, Olifson S, Ghaffar A, Terry RF. A checklist for health research priority setting: nine  
14 324 common themes of good practice. *Health Research Policy and Systems*. 2010;8(1):36.
- 15 325 10. National Health and Medical Research Council. NHMRC Principles of Peer Review [Available from:  
16 326 <https://www.nhmrc.gov.au/grants-funding/peer-review/nhmrc-principles-peer-review>.  
17 327
- 18 327 11. Rudan I, Gibson J, Kapiriri L, Lansang MA, Hyder AA, Lawn J, et al. Setting priorities in global child  
19 328 health research investments: assessment of principles and practice. *Croatian medical journal*.  
20 329 2007;48(5):595-604.
- 21 330 12. Okello D CP. The COHRED Working Group on Priority Setting. A manual for research priority setting  
22 331 using the ENHR Strategy [Available from: <http://www.cohred.org/downloads/578.pdf>.  
23 332
- 24 332 13. Ghaffar A CT, Matlin SA, Olifson S. The 3D combined approach matrix: An improved tool for setting  
25 333 priorities in research for health. *The Global Forum for Health Research* [Available from:  
26 334 [http://www.webcitation.org/query.php?url=http://www.globalforumhealth.org/content/download/7860/  
27 335 50203/file/CAM\\_3D\\_GB.pdf&refdoi=10.1186/1478-4505-8-36](http://www.webcitation.org/query.php?url=http://www.globalforumhealth.org/content/download/7860/50203/file/CAM_3D_GB.pdf&refdoi=10.1186/1478-4505-8-36).  
28 336
- 29 336 14. WHO. Ad Hoc Committee on Health Research Relating to Future Intervention Options. Investing in  
30 337 health research and development. 1996 [Available from:  
31 338 [http://apps.who.int/iris/bitstream/10665/63139/1/TDR\\_GEN\\_96.2.pdf](http://apps.who.int/iris/bitstream/10665/63139/1/TDR_GEN_96.2.pdf).  
32 339
- 33 340 15. Nasser M, Welch V, Ueffing E, Crowe S, Oliver S, Carlo R. Evidence in agenda setting: new directions  
34 341 for the Cochrane Collaboration. *Journal of clinical epidemiology*. 2013;66(5):469-71.
- 35 342 16. Australian Competitive Grants Register. [Available from: [https://www.education.gov.au/australian-  
36 343 competitive-grants-register](https://www.education.gov.au/australian-competitive-grants-register).  
37 344
- 38 344 17. National Health and Medical Research Council-Boosting Dementia Research Grants [Available from:  
39 345 [https://www.nhmrc.gov.au/book/nhmrc-funding-rules-2017/nhmrc-funding-rules-2017/boosting-  
40 346 dementia-research-grants-scheme/3](https://www.nhmrc.gov.au/book/nhmrc-funding-rules-2017/nhmrc-funding-rules-2017/boosting-dementia-research-grants-scheme/3).  
41 347
- 42 348 18. National Health and Medical Research Council-Dementia Research Team Grants [Available from:  
43 349 [https://www.nhmrc.gov.au/book/nhmrc-funding-rules/section-o-dementia-research-team-grants/o6-  
44 350 assessment](https://www.nhmrc.gov.au/book/nhmrc-funding-rules/section-o-dementia-research-team-grants/o6-assessment).  
45 351
- 46 352 19. National Health and Medical Research Council-Development Grants [Available from:  
47 353 [https://www.nhmrc.gov.au/book/nhmrc-funding-rules-2017/development-grants-scheme-specific-funding-  
48 354 rules-funding-commencing/4](https://www.nhmrc.gov.au/book/nhmrc-funding-rules-2017/development-grants-scheme-specific-funding-rules-funding-commencing/4).  
49 355
- 50 355 20. National Health and Medical Research Council-Global Alliance for Chronic Diseases(GACD) [Available  
51 356 from: [https://www.nhmrc.gov.au/book/nhmrc-funding-rules-2017/global-alliance-chronic-diseases-gacd-  
52 357 scheme-specific-funding-rules/4](https://www.nhmrc.gov.au/book/nhmrc-funding-rules-2017/global-alliance-chronic-diseases-gacd-scheme-specific-funding-rules/4).  
53 358
- 54 359 21. National Health and Medical Research Council-NHMRC National Institute for Dementia Research  
55 360 Grants [Available from: <https://www.nhmrc.gov.au/book/5-assessment-criteria-0>.  
56 361
- 57 362 22. National Health and Medical Research Council-NHMRC/NSFC Joint Call for Research to Enhance  
58 363 Prediction and Improve the Treatment of Type 2 Diabetes in China and Australia [Available from:  
59 364 <https://www.nhmrc.gov.au/book/3-assessment-criteria-1>.  
60 365
- 60 364 23. National Health and Medical Research Council-Northern Australia Tropical Disease Collaborative  
61 365 Research Programme-specific [Available from: [https://www.nhmrc.gov.au/book/nhmrc-funding-rules-  
2016/NHMRC-funding-rules-2016/Orthern-australia-tropical-disease/3](https://www.nhmrc.gov.au/book/nhmrc-funding-rules-2016/NHMRC-funding-rules-2016/Orthern-australia-tropical-disease/3).  
62 366
- 63 366 24. National Health and Medical Research Council-Partnership Projects [Available from:  
64 367 [https://www.nhmrc.gov.au/book/nhmrc-funding-rules-2017/nhmrc-funding-rules-2017/partnership-  
65 368 projects-scheme-specific-3](https://www.nhmrc.gov.au/book/nhmrc-funding-rules-2017/nhmrc-funding-rules-2017/partnership-projects-scheme-specific-3).

- 1  
2 366 25. National Health and Medical Research Council-Program Grants [Available from:  
3 367 [https://www.nhmrc.gov.au/book/nhmrc-funding-rules-2017/program-grants-scheme-specific-funding-](https://www.nhmrc.gov.au/book/nhmrc-funding-rules-2017/program-grants-scheme-specific-funding-rules-funding-commencing-2019/4)  
4 368 [rules-funding-commencing-2019/4](https://www.nhmrc.gov.au/book/nhmrc-funding-rules-2017/program-grants-scheme-specific-funding-rules-funding-commencing-2019/4).  
5 369 26. National Health and Medical Research Council-Project Grants [Available from:  
6 370 [https://www.nhmrc.gov.au/book/nhmrc-funding-rules-2017/project-grants-scheme-specific-funding-rules-](https://www.nhmrc.gov.au/book/nhmrc-funding-rules-2017/project-grants-scheme-specific-funding-rules-funding-commencing-2018/4)  
7 371 [funding-commencing-2018/4](https://www.nhmrc.gov.au/book/nhmrc-funding-rules-2017/project-grants-scheme-specific-funding-rules-funding-commencing-2018/4).  
8 372 27. National Health and Medical Research Council-Targeted Call for Research into Engaging and  
9 373 Retaining Young Adults [Available from: <https://www.nhmrc.gov.au/book/8-assessment-applications-1>.  
10 374 28. National Health and Medical Research Council-Targeted Call for Research into MENTAL HEALTH :  
11 375 Suicide Prevention in Aboriginal and Torres Strait Islander Youth [  
12 376 29. National Health and Medical Research Council-"Targeted Call for Research into Fetal Alcohol  
13 377 Spectrum Disorder among Aboriginal and Torres Strait Islander Peoples " [Available from:  
14 378 [https://www.nhmrc.gov.au/grants-funding/apply-funding/targeted-and-urgent-calls-research/fetal-](https://www.nhmrc.gov.au/grants-funding/apply-funding/targeted-and-urgent-calls-research/fetal-alcohol-spectrum-disorder-ta-0)  
15 379 [alcohol-spectrum-disorder-ta-0](https://www.nhmrc.gov.au/grants-funding/apply-funding/targeted-and-urgent-calls-research/fetal-alcohol-spectrum-disorder-ta-0).  
16 380 30. National Health and Medical Research Council-Targeted Call for Research into Preparing Australia for  
17 381 the Genomics Revolution in Health Care (Genomics TCR) [Available from:  
18 382 <https://www.nhmrc.gov.au/book/8-assessment-applications>.  
19 383 31. National Health and Medical Research Council-Targeted Call for Research into Wind Farms and  
20 384 Human Health [Available from: <https://www.nhmrc.gov.au/book/8-assessment-applications-0>.  
21 385 32. National Health and Medical Research Council-Translational Research Projects for Improved Health  
22 386 Care [Available from:  
23 387 [https://www.nhmrc.gov.au/files\\_nhmrc/file/research/translational\\_research\\_projects\\_v11.pdf](https://www.nhmrc.gov.au/files_nhmrc/file/research/translational_research_projects_v11.pdf).  
24 388 33. Cancer Australia-Priority-Driven Collaborative Cancer Scheme [Available from:  
25 389 [https://canceraustralia.gov.au/sites/default/files/2017\\_round\\_pdccrs\\_grant\\_guidelines\\_rules\\_for\\_applicants\\_standard\\_project\\_grants\\_161221\\_2.pdf](https://canceraustralia.gov.au/sites/default/files/2017_round_pdccrs_grant_guidelines_rules_for_applicants_standard_project_grants_161221_2.pdf).  
26 390 34. Cancer Australia-Support for Cancer Clinical Trials Program-Existing National Cooperative Oncology  
27 391 Groups [Available from:  
28 392 [https://canceraustralia.gov.au/sites/default/files/publications/grant\\_guidelines.pdf](https://canceraustralia.gov.au/sites/default/files/publications/grant_guidelines.pdf).  
29 393 35. National Breast Cancer Foundation-Accelerator Research Grant [Available from:  
30 394 [http://docplayer.net/50962154-National-breast-cancer-foundation-accelerator-research-grant-application-](http://docplayer.net/50962154-National-breast-cancer-foundation-accelerator-research-grant-application-guidelines.html)  
31 395 [guidelines.html](http://docplayer.net/50962154-National-breast-cancer-foundation-accelerator-research-grant-application-guidelines.html).  
32 396 36. National Breast Cancer Foundation-Innovator Grant [Available from: [http://nbcf.org.au/wp-](http://nbcf.org.au/wp-content/uploads/2015/11/NBCF_2017_Inovator_Grant_Guidelines.pdf)  
33 397 [content/uploads/2015/11/NBCF\\_2017\\_Inovator\\_Grant\\_Guidelines.pdf](http://nbcf.org.au/wp-content/uploads/2015/11/NBCF_2017_Inovator_Grant_Guidelines.pdf).  
34 398 37. Department of Foreign Affairs and Trade-Tropical Disease Research Regional Collaboration Initiative  
35 399 [Available from: Tropical Disease Research Regional Collaboration Initiative.  
36 400 38. Alzheimer's Australia Dementia Research Foundation-Dementia Grants Program [Available from:  
37 401 [https://www.dementiaresearchfoundation.org.au/sites/default/files/2017\\_DEMENTIA\\_GRANTS\\_PROGRA](https://www.dementiaresearchfoundation.org.au/sites/default/files/2017_DEMENTIA_GRANTS_PROGRAM-Information_for_Applicants.pdf)  
38 402 [M-Information for Applicants.pdf](https://www.dementiaresearchfoundation.org.au/sites/default/files/2017_DEMENTIA_GRANTS_PROGRA).  
39 403 39. Australian and New Zealand College of Anaesthetists-ANZCA Research Grants Program  
40 404 [Available from: [http://www.anzca.edu.au/documents/fdn-2018-project-grant-guide-incl-](http://www.anzca.edu.au/documents/fdn-2018-project-grant-guide-incl-simulation_educa.pdf)  
41 405 [simulation\\_educa.pdf](http://www.anzca.edu.au/documents/fdn-2018-project-grant-guide-incl-simulation_educa.pdf).  
42 406 40. Australian Rotary Health-Mental Health Research Grants [Available from:  
43 407 <https://australianrotaryhealth.org.au/research/current-research-opportunities/>.  
44 408 41. BUPA Foundation (Australia) limited-Bupa Health Foundation  
45 409 [Available from: <http://www.bupa.com.au/about-us/bupa-health-foundation/about>  
46 410 <http://www.bupa.com.au/about-us/bupa-health-foundation/about>  
47 411 42. Cure for Motor Neurone disease Foundation-Translational Research Grants [Available from:  
48 412 <https://curemnd.org.au/research/research-grants/>.  
49 413 43. Diabetes Australia Research Trust General Grants [Available from:  
50 414 [https://static.diabetesaustralia.com.au/s/fileassets/diabetes-australia/bdd46dd3-2222-4d14-ad27-](https://static.diabetesaustralia.com.au/s/fileassets/diabetes-australia/bdd46dd3-2222-4d14-ad27-42af9e97506c.pdf)  
51 415 [42af9e97506c.pdf](https://static.diabetesaustralia.com.au/s/fileassets/diabetes-australia/bdd46dd3-2222-4d14-ad27-42af9e97506c.pdf).  
52  
53  
54  
55  
56  
57  
58  
59  
60

- 1  
2 416 44. Healthway (Western Australian Health Promotion Foundation)-Health Promotion Intervention  
3 417 Research Grants [Available from: [https://www.healthway.wa.gov.au/grants-programs/health-promotion-](https://www.healthway.wa.gov.au/grants-programs/health-promotion-research-grants/apply-0w/)  
4 418 [research-grants/apply-0w/](https://www.healthway.wa.gov.au/grants-programs/health-promotion-research-grants/apply-0w/).  
5 419 45. HCF Research Foundation-Health Services Research Grants [Available from:  
6 420 <https://www.hcf.com.au/about-us/hcf-foundation/hcf-foundation-applications>.  
7 421 46. Motor Neurone Disease Research Institute of Australia-Motor Neurone Disease Research Grants  
8 422 [Available from: [http://www.mndaust.asn.au/Documents/Research-documents/Grants/2017-funding-](http://www.mndaust.asn.au/Documents/Research-documents/Grants/2017-funding-round/Application_Guidelines_GIA_final.aspx)  
9 423 [round/Application\\_Guidelines\\_GIA\\_final.aspx](http://www.mndaust.asn.au/Documents/Research-documents/Grants/2017-funding-round/Application_Guidelines_GIA_final.aspx).  
10 424 47. Multiple Sclerosis Research Australia-Research Grants [Available from: [https://msra.org.au/annual-](https://msra.org.au/annual-funding-opportunities/types-of-grants/)  
11 425 [funding-opportunities/types-of-grants/](https://msra.org.au/annual-funding-opportunities/types-of-grants/).  
12 426 48. National Heart Foundation of Australia-Vanguard Grants [Available from:  
13 427 [https://www.heartfoundation.org.au/images/uploads/researchers/2017\\_VG\\_Instructions\\_FINAL.pdf](https://www.heartfoundation.org.au/images/uploads/researchers/2017_VG_Instructions_FINAL.pdf).  
14 428 49. Prostate Cancer Foundation of Australia-New Concept Grant [Available from:  
15 429 <http://www.prostate.org.au/media/784704/2017-PCFA-Guide-for-Applicants-New-Concept-Grant.pdf>.  
16 430 50. The Movember Group and Beyondblue- Australian Mental Health Initiative [Available from:  
17 431 [https://au.movember.com/uploads/files/2013/Programs/Movember%20Australian%20Mental%20Health%](https://au.movember.com/uploads/files/2013/Programs/Movember%20Australian%20Mental%20Health%20Initiative%20RFA%20Nov%202013.pdf)  
18 432 [20Initiative%20RFA%20Nov%202013.pdf](https://au.movember.com/uploads/files/2013/Programs/Movember%20Australian%20Mental%20Health%20Initiative%20RFA%20Nov%202013.pdf).  
19 433 51. McLean RKD, Sen K. Making a difference in the real world? A meta-analysis of the quality of use-  
20 434 oriented research using the Research Quality Plus approach. *Research Evaluation*. 2018;rvy026-rvy.  
21 435 52. Forsythe LP, Frank LB, Tafari AT, Cohen SS, Lauer M, Clauser S, et al. Unique Review Criteria and  
22 436 Patient and Stakeholder Reviewers: Analysis of PCORI's Approach to Research Funding. *Value Health*.  
23 437 2018;21(10):1152-60.  
24 438 53. Greenhalgh T, Raftery J, Hanney S, Glover M. Research impact: a narrative review. *BMC medicine*.  
25 439 2016;14(1):78.  
26 440 54. Chalmers I, Bracken MB, Djulbegovic B, Garattini S, Grant J, Gulmezoglu AM, et al. How to increase  
27 441 value and reduce waste when research priorities are set. *Lancet*. 2014;383(9912):156-65.  
28 442 55. Chalmers I, Glasziou P. Systematic reviews and research waste. *Lancet*. 2016;387(10014):122-3.  
29 443 56. Fleurence RL, Forsythe LP, Lauer M, Rotter J, Ioannidis JP, Beal A, et al. Engaging patients and  
30 444 stakeholders in research proposal review: the patient-centered outcomes research institute. *Annals of*  
31 445 *internal medicine*. 2014;161(2):122-30.  
32 446 57. Donovan C. State of the art in assessing research impact: introduction to a special issue. *Research*  
33 447 *Evaluation*. 2011;20(3):175-9.  
34 448 58. Donovan C. The Australian Research Quality Framework: A live experiment in capturing the social,  
35 449 economic, environmental, and cultural returns of publicly funded research. *New Directions for Evaluation*.  
36 450 2008;2008(118):47-60.  
37 451 59. Claxton K, Posnett J. An economic approach to clinical trial design and research priority-setting.  
38 452 *Health Econ*. 1996;5(6):513-24.  
39 453 60. Tuffaha HW, LG G, Scuffham P. Value of Information Analysis Informing Adoption and Research  
40 454 Decisions in a Portfolio of Health Care Interventions. *Medical Decision Making Policy & PRACTICE*. 2016.  
41 455 61. Drummond M, Sculpher M, Torrance G, O'Brien B, Stoddart G. *Methods for the economic evaluation*  
42 456 *of health care programmes*. Oxford: Oxford University Press; 2005.  
43 457 62. Townsend J, Buxton M, Harper G. Prioritisation of health technology assessment. The PATHS model:  
44 458 methods and case studies. *Health Technol Assess*. 2003;7(20):iii, 1-82.  
45 459 63. Claxton K, Griffin S, Koffijberg H, McKenna C. How to estimate the health benefits of additional  
46 460 research and changing clinical practice. *BMJ (Clinical research ed)*. 2015;351:h5987.  
47 461 64. Bennette CS, Veenstra DL, Basu A, Baker LH, Ramsey SD, Carlson JJ. Development and Evaluation of  
48 462 an Approach to Using Value of Information Analyses for Real-Time Prioritization Decisions Within SWOG, a  
49 463 Large Cancer Clinical Trials Cooperative Group. *Med Decis Making*. 2016.  
50 464 65. National Health and Medical Research Council. Peer Review Consultation Paper [Available from:  
51 465 [https://consultations.nhmrc.gov.au/public\\_consultations/nhmrc-grant-program-review](https://consultations.nhmrc.gov.au/public_consultations/nhmrc-grant-program-review).  
52  
53  
54  
55  
56  
57  
58  
59  
60

1  
2 468  
3  
4 469  
5 470  
6  
7  
8  
9  
10  
11  
12  
13  
14  
15  
16  
17  
18  
19  
20  
21  
22  
23  
24  
25  
26  
27  
28  
29  
30  
31  
32  
33  
34  
35  
36  
37  
38  
39  
40  
41  
42  
43  
44  
45  
46  
47  
48  
49  
50  
51  
52  
53  
54  
55  
56  
57  
58  
59  
60

For peer review only

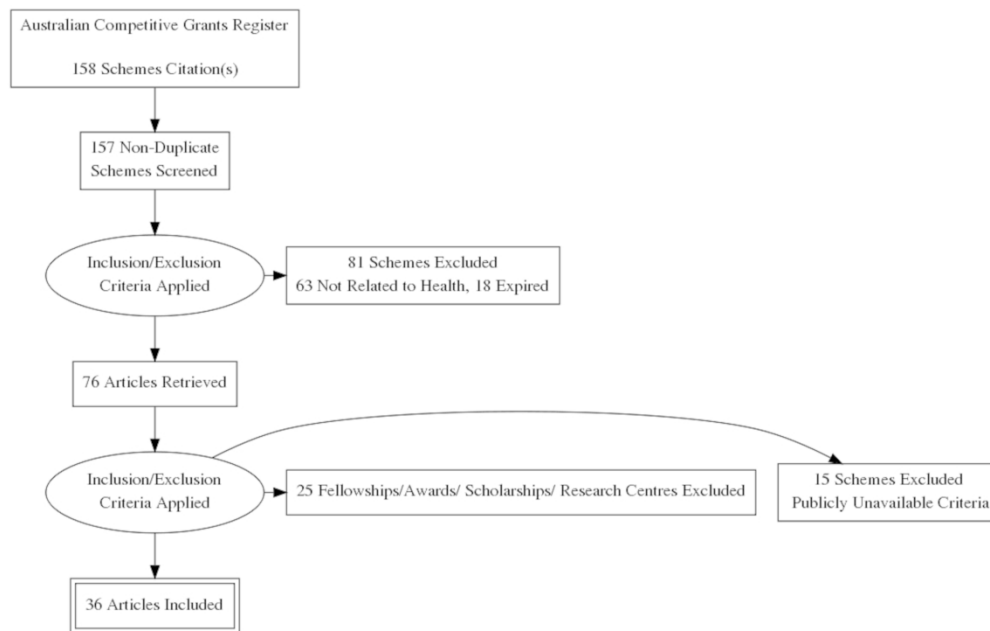

Fig1: Flowchart of the review

567x358mm (300 x 300 DPI)

1  
2  
3  
4  
5  
6  
7  
8  
9  
10  
11  
12  
13  
14  
15  
16  
17  
18  
19  
20  
21  
22  
23  
24  
25  
26  
27  
28  
29  
30  
31  
32  
33  
34  
35  
36  
37  
38  
39  
40  
41  
42  
43  
44  
45  
46  
47  
48  
49  
50  
51  
52  
53  
54  
55  
56  
57  
58  
59  
60

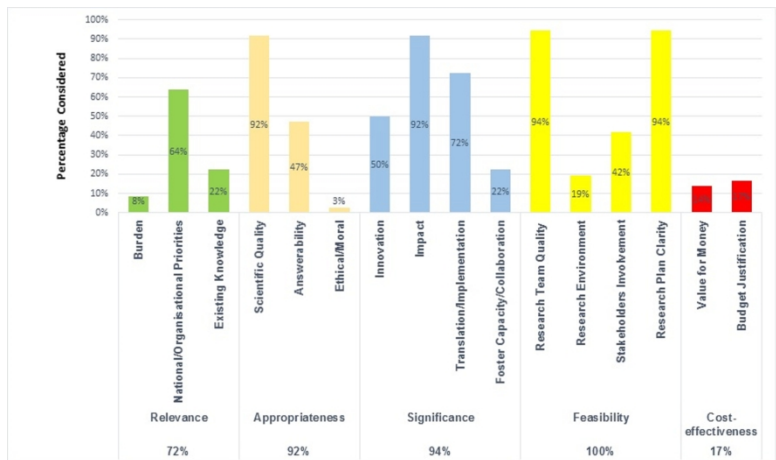

Fig2: Overall research criteria and their representative domains

609x342mm (300 x 300 DPI)



### Summary of selection criteria and scoring weights of the included schemes

| Agency | Scheme name                                              | Year listed | Assessment criteria                                                                                                                | Score  |
|--------|----------------------------------------------------------|-------------|------------------------------------------------------------------------------------------------------------------------------------|--------|
| NHMRC  | Partnership Projects                                     | 2017        | Track record of investigators relative to opportunity                                                                              | 25%    |
|        |                                                          |             | Scientific quality of the proposal and methodology                                                                                 | 25%    |
|        |                                                          |             | Relevance and likelihood to influence health and research policy and practice                                                      | 25%    |
|        |                                                          |             | Strength of partnership                                                                                                            | 25%    |
| NHMRC  | Program Grants                                           | 2017        | Team research achievements (publications, grants, awards)                                                                          | 60%    |
|        |                                                          |             | Research strategy (quality, addresses important issues, impact, innovation, achievable)                                            | 20%    |
|        |                                                          |             | Collaborative gain (team integration, training and mentoring)                                                                      | 20%    |
| NHMRC  | Project Grants                                           | 2017        | Scientific quality (research plan clarity, appropriateness and feasibility)                                                        | 50%    |
|        |                                                          |             | Significance of outcomes and/or innovation of the concept (advance knowledge, outcomes. translation, publications)                 | 25%    |
|        |                                                          |             | Team quality and capability relative to opportunity (expertise, reputation, achievements)                                          | 25%    |
| NHMRC  | Global Alliance for Chronic Diseases (GACD) <sup>a</sup> | 2014        | Relevance and quality of project (scheme objectives, appropriate and feasible methods, innovative, ethical)                        | 25%    |
|        |                                                          |             | Quality of team (high quality track-record, capacity building, public engagement)                                                  | 25%    |
|        |                                                          |             | Implementation plans/feasibility (challenges identified, inequality gaps considered)                                               | 25%    |
|        |                                                          |             | Potential impact (outcome utilization, economic impact assessed)                                                                   | 25%    |
| NHMRC  | NHMRC's Targeted Call for Research Program <sup>b</sup>  | 2013        | Scientific quality and likelihood to answer the research question(s) (relevant, feasible consumers engaged)                        | 40-60% |
|        |                                                          |             | Whether the team has all the necessary skills and expertise to achieve the expected outcomes                                       | 20-50% |
|        |                                                          |             | Significance of the project and expected outcomes                                                                                  | 0-40%  |
| NHMRC  | Dementia Research Team Grants                            | 2014        | Generate new knowledge that leads to improved health outcomes (clarity, quality of methods, feasibility, innovation)               | 25%    |
|        |                                                          |             | Record of research and translation achievement - relative to opportunity (contribution to the field of research, research outputs) | 25%    |
|        |                                                          |             | Facilitate collaboration (collaboration, integration and cohesiveness of the team)                                                 | 20%    |
|        |                                                          |             | Promote effective transfer of outcomes into health policy and/or practice (quality of the plan, involvement of end user)           | 20%    |
|        |                                                          |             | Develop the health and medical research workforce                                                                                  | 10%    |
| NHMRC  | Development Grants                                       | 2017        | Scientific merit of the proposal (quality of the scientific research)                                                              | 40%    |
|        |                                                          |             | Record of commercial achievements (relative to opportunity)                                                                        | 20%    |
|        |                                                          |             | Commercial potential (high impact, innovation, relevant to schemes objectives)                                                     | 40%    |
| NHMRC  |                                                          | 2015        | Relevance to the aims of the round and significance of outcomes (relevant to scheme objectives, potential to improve outcomes)     | 30%    |

|                                         |                                                                                |      |                                                                                                                                   |     |
|-----------------------------------------|--------------------------------------------------------------------------------|------|-----------------------------------------------------------------------------------------------------------------------------------|-----|
|                                         | National Institute for Dementia Research Grants                                |      | Project design, methods and analyses (feasible and suitable environment, consumers and clinicians engaged)                        | 30% |
|                                         |                                                                                |      | Budget justification and value for money (proposal demonstrates that it is cost effective)                                        | 15% |
|                                         |                                                                                |      | Team quality and capability relevant to the project (team capacity, ability, and expertise)                                       | 25% |
| NHMRC                                   | NHMRC/NSFC, Prediction and Treatment of Type 2 Diabetes in China and Australia | 2015 | Scientific quality of the project including feasibility (fits within aims of the scheme, feasible, appropriate methods)           | 25% |
|                                         |                                                                                |      | Significance of the expected outcomes (impact on health, advance knowledge)                                                       | 25% |
|                                         |                                                                                |      | Track record of the team (team capability, track-record)                                                                          | 25% |
|                                         |                                                                                |      | Added value of international collaboration (collaboration, transfer of knowledge)                                                 | 25% |
| NHMRC                                   | Northern Australia Tropical Disease Collaborative Research Program             | 2016 | Generate new knowledge that leads to improved health outcomes                                                                     | 20% |
|                                         |                                                                                |      | Promote effective transfer of research outcomes into health policy and/or practice                                                | 20% |
|                                         |                                                                                |      | Develop the health and medical research workforce                                                                                 | 20% |
|                                         |                                                                                |      | Facilitate collaboration                                                                                                          | 20% |
|                                         |                                                                                |      | Record of research and translation achievements - relative to opportunity                                                         | 20% |
| NHMRC                                   | Translational Research Projects                                                | 2017 | Significant relevance to the health system                                                                                        | NA  |
|                                         |                                                                                |      | Inform evidence-based improvement to health care                                                                                  | NA  |
|                                         |                                                                                |      | Outcomes for patients, and/or efficiency in healthcare and/or cost savings                                                        | NA  |
|                                         |                                                                                |      | Includes a plan for dissemination of results within the healthcare sector                                                         | NA  |
|                                         |                                                                                |      | Represents value for money                                                                                                        | NA  |
|                                         |                                                                                |      | Excellent level research team                                                                                                     | NA  |
| NHMRC                                   | Boosting Dementia Research Grants                                              | 2017 | Relevance to the aims of the round and significance of expected outcomes                                                          | 30% |
|                                         |                                                                                |      | Project design, methods and analyses (clear, coherent, involvement with consumers, innovation, feasible, translation/impact)      | 30% |
|                                         |                                                                                |      | Project justification and value for money (demonstrate value for money)                                                           | 15% |
|                                         |                                                                                |      | Team quality and capability relevant to the project (team strength, reputation, contributions)                                    | 25% |
| Department of Foreign Affairs and Trade | Tropical Disease Research Regional Collaboration Initiative                    | 2017 | Activity effectiveness and value for money (strengthen research capability and collaboration, clear objectives, budget justified) | 50% |
|                                         |                                                                                |      | Organisational effectiveness (record of strengthening research collaboration)                                                     | 50% |
| Cancer Australia                        | Priority-Driven Collaborative Cancer Scheme                                    | 2017 | Team quality and capability relevant to the application                                                                           | 40% |
|                                         |                                                                                |      | Outcomes and impact of current proposal                                                                                           | 25% |
|                                         |                                                                                |      | Translation of research                                                                                                           | 10% |
|                                         |                                                                                |      | Collaborations                                                                                                                    | 15% |
|                                         |                                                                                |      | Consumer involvement                                                                                                              | 10% |

|                                                            |                                                  |      |                                                                                                                               |       |
|------------------------------------------------------------|--------------------------------------------------|------|-------------------------------------------------------------------------------------------------------------------------------|-------|
| Cancer Australia                                           | Support for Cancer Clinical Trials Program Grant | 2013 | National multi-disciplinary membership, governance structure, data and quality, capacity building, collaboration, translation | 33.3% |
|                                                            |                                                  |      | How the funding will be utilized                                                                                              | 33.3% |
|                                                            |                                                  |      | Budget and value for money                                                                                                    | 33.3% |
| Alzheimer's Australia Dementia Research Foundation         | Dementia Grants Program                          | 2017 | Scientific merit and quality (relevance, clarity and suitability of methods and plan)                                         | 50%   |
|                                                            |                                                  |      | Track record and independence of the applicant                                                                                | 30%   |
|                                                            |                                                  |      | Innovation/originality                                                                                                        | 20%   |
|                                                            |                                                  |      | The Scientific Panel will also consider the feasibility of proposed projects                                                  |       |
| Australian and New Zealand College of Anaesthetists        | Project Grants                                   | 2017 | Scientific merit, design/methods, track record, originality, feasibility and international competitiveness                    | NA    |
| Australian Rotary Health                                   | Mental Health Research Grants                    | 2017 | Scientific excellence of the project                                                                                          | NA    |
|                                                            |                                                  |      | Innovation of the project                                                                                                     | NA    |
|                                                            |                                                  |      | Track record of the applicant                                                                                                 | NA    |
|                                                            |                                                  |      | Feasibility, including relevant partnerships                                                                                  | NA    |
|                                                            |                                                  |      | Practical benefits to the mental health of the community                                                                      | NA    |
| Bupa Foundation (Australia) Limited                        | Bupa Health Foundation                           | 2017 | Direct impact on health outcomes                                                                                              | NA    |
|                                                            |                                                  |      | Timing of delivery of results                                                                                                 | NA    |
|                                                            |                                                  |      | Justification of funding                                                                                                      | NA    |
|                                                            |                                                  |      | Study/program design                                                                                                          | NA    |
|                                                            |                                                  |      | Reputation of organisation                                                                                                    | NA    |
| Cure for MND Foundation                                    | Translational Research Grants                    | 2017 | Research strategy and feasibility                                                                                             | 50%   |
|                                                            |                                                  |      | Impact and transition potential                                                                                               | 25%   |
|                                                            |                                                  |      | Personnel and budget                                                                                                          | 25%   |
| Diabetes Australia Research Trust                          | General Grants                                   | 2017 | Research methods and quality                                                                                                  | 40%   |
|                                                            |                                                  |      | Potential research outcomes                                                                                                   | 60%   |
| Healthway (Western Australian Health Promotion Foundation) | Health Promotion Intervention Research Grants    | 2017 | Ability to directly improve health and community outcomes in priority health areas                                            | NA    |
|                                                            |                                                  |      | Contribution of the research to best practice in health promotion                                                             | NA    |
|                                                            |                                                  |      | The quality of the translation plan                                                                                           | NA    |
|                                                            |                                                  |      | End-user partnerships and collaboration                                                                                       | NA    |
|                                                            |                                                  |      | Soundness of rationale and methodology                                                                                        | NA    |
|                                                            |                                                  |      | Track record and capability of research team                                                                                  | NA    |
| HCF Research Foundation                                    | Health Services Research Grants                  | 2017 | Scientific merit (design, methodology, feasibility, budget)                                                                   | 40%   |
|                                                            |                                                  |      | Relevance to HCF objectives (translation, response to knowledge gaps, improve health)                                         | 40%   |
|                                                            |                                                  |      | General (repeat other studies/ongoing studies, burden of disease)                                                             | 20%   |
|                                                            | Grants-in-aid                                    | 2017 | Track record of the applicant                                                                                                 | NA    |

1  
2  
3  
4  
5  
6  
7  
8  
9  
10  
11  
12  
13  
14  
15  
16  
17  
18  
19  
20  
21  
22  
23  
24  
25  
26  
27  
28  
29  
30  
31  
32  
33  
34  
35  
36  
37  
38  
39  
40  
41  
42  
43  
44  
45  
46

|                                                       |                                     |      |                                                                                                                       |     |
|-------------------------------------------------------|-------------------------------------|------|-----------------------------------------------------------------------------------------------------------------------|-----|
| Motor Neurone Disease Research Institute of Australia |                                     |      | Strength of the research plan                                                                                         | NA  |
|                                                       |                                     |      | Relevance to Motor Neurone Disease                                                                                    | NA  |
| Multiple Sclerosis Research Australia                 | Research Grants                     | 2017 | Relevance to Multiple Sclerosis                                                                                       | NA  |
|                                                       |                                     |      | Significance (value and novelty)                                                                                      | NA  |
|                                                       |                                     |      | Feasibility of methods                                                                                                | NA  |
|                                                       |                                     |      | Track record of applicants                                                                                            | NA  |
| National Breast Cancer Foundation                     | Innovator Grant                     | 2017 | Novelty of the project                                                                                                | 50% |
|                                                       |                                     |      | Track record of applicant                                                                                             | 20% |
|                                                       |                                     |      | Quality and feasibility                                                                                               | 20% |
|                                                       |                                     |      | Relevance to National Breast Cancer Foundation research priorities                                                    | 10% |
| National Breast Cancer Foundation                     | Accelerator Research Grant          | 2016 | Translational potential and impact on breast cancer outcomes                                                          | 50% |
|                                                       |                                     |      | Track record of applicant team                                                                                        | 20% |
|                                                       |                                     |      | Scientific quality and feasibility                                                                                    | 20% |
|                                                       |                                     |      | Relevance to National Breast Cancer Foundation research priorities                                                    | 10% |
| National Heart Foundation                             | Vanguard Grant                      | 2017 | Track record of applicants                                                                                            | NA  |
|                                                       |                                     |      | How well the application addresses the purpose of the award                                                           | NA  |
|                                                       |                                     |      | Quality of the research proposal                                                                                      | NA  |
|                                                       |                                     |      | Feasibility of the research proposal                                                                                  | NA  |
|                                                       |                                     |      | Potential to produce tangible outcomes                                                                                | NA  |
| Prostate Cancer Foundation of Australia               | New Concept Grant                   | 2017 | Track record of investigator team                                                                                     | NA  |
|                                                       |                                     |      | Scientific and technical merit of the research question, feasibility, design and methodology.                         | NA  |
|                                                       |                                     |      | Innovation                                                                                                            | NA  |
|                                                       |                                     |      | Potential impact on prostate cancer                                                                                   | NA  |
|                                                       |                                     |      | Research environment (suitability, expertise and collaboration)                                                       | NA  |
| The Movember Group and Beyondblue                     | Australian Mental Health Initiative | 2013 | Alignment and fit with Movember’s strategic goals                                                                     | NA  |
|                                                       |                                     |      | Significance/innovation of the project (advance management, address significant areas)                                | NA  |
|                                                       |                                     |      | Project proposal (clarity, achievability, collaboration, consultation with stakeholders, plan, knowledge translation) | NA  |
|                                                       |                                     |      | The project team (proven expertise, capability, record)                                                               | NA  |

NHMRC: National Health and Medical Research Council, NSFC: National Natural Science Foundation of China, MND: Motor Neurone Disease, HCF: The Hospitals Contribution Fund of Australia.

<sup>a</sup> Global Alliance for Chronic Disease Grants include: Request for Applications on Type 2 Diabetes in Low and Middle Income Countries, Request for Applications on the Prevention and Management of Chronic Lung Disease in Middle and Low Income Countries and Indigenous Communities in Australia and Canada, Request for Prevention and Management of Mental Disorders in Low and Middle Income Countries and Indigenous Communities in High Income Countries.

1  
2  
3 <sup>b</sup>Targeted calls include: Targeted Call for Research into Wind Farms and Human Health, Targeted Call for Research into Preparing Australia for the Genomics Revolution in Health Care, Targeted  
4 Call for Research into Engaging and Retaining Young Adults in Interventions to Improve Eating Behaviours and Health Outcomes, Targeted Call for Research into Fetal Alcohol Spectrum  
5 Disorder among Aboriginal and Torres Strait Islander Peoples, Targeted Call for Research into Mental Health : Suicide Prevention in Aboriginal and Torres Strait Islander Peoples  
6  
7  
8  
9  
10  
11  
12  
13  
14  
15  
16  
17  
18  
19  
20  
21  
22  
23  
24  
25  
26  
27  
28  
29  
30  
31  
32  
33  
34  
35  
36  
37  
38  
39  
40  
41  
42  
43  
44  
45  
46

For peer review only
